# Supplementary material for: Degradation of pesticides diazinon and diazoxon by phosphotriesterase: insight into divergent mechanisms from QM/MM and MD simulations
Source: Royal Society of Chemistry journal article supplement (doi:10.1039/d1cp05034f), 2021-12-06
Supplement: d1cp05034f1.pdf [file d1cp05034f1.pdf]

## Electronic Supplementary Information for

### Degradation of Pesticides Diazinon and Diazoxon by Phosphotriesterase: Insight into Divergent Mechanisms from QM/MM and MD Simulations

Yuzhuang Fu,<sup>a</sup> Yuwei Zhang,<sup>a</sup> Fangfang Fan,<sup>\*b</sup> Binju Wang<sup>\*a</sup> and Zexing Cao<sup>\*a</sup>

<sup>a</sup> State Key Laboratory of Physical Chemistry of Solid Surfaces and Fujian Provincial Key Laboratory of Theoretical and Computational Chemistry, College of Chemistry and Chemical Engineering, Xiamen University, Xiamen, China, 361005

<sup>b</sup> School of Biological and Chemical Engineering, Zhejiang University of Science and Technology, Hangzhou, China, 310023

#### Contents

|                                                                 |   |
|-----------------------------------------------------------------|---|
| Table S1 .....                                                  | 2 |
| Fig.S1 .....                                                    | 3 |
| Fig.S2 .....                                                    | 3 |
| Fig.S3 .....                                                    | 4 |
| Fig. S4 .....                                                   | 4 |
| Fig. S5 .....                                                   | 5 |
| Fig. S6 .....                                                   | 5 |
| Fig. S7 .....                                                   | 6 |
| Fig. S8 .....                                                   | 6 |
| Cartesian coordinates of QM region from QM/MM calculations..... | 7 |

**Table S1.** The distances between zinc ions and the first shell residues for enzyme-DIN and enzyme-DON systems (Å).

|                                                   | DIN         | DON         |
|---------------------------------------------------|-------------|-------------|
| Zn <sub>α</sub> -N <sub>His55</sub>               | 2.50 ± 0.24 | 2.32 ± 0.30 |
| Zn <sub>α</sub> -N <sub>His57</sub>               | 2.24 ± 0.13 | 2.05 ± 0.10 |
| Zn <sub>α</sub> -O <sub>Lys169</sub>              | 1.83 ± 0.05 | 1.80 ± 0.05 |
| Zn <sub>α</sub> -O <sub>Asp301</sub>              | 1.80 ± 0.04 | 1.78 ± 0.04 |
| Zn <sub>α</sub> -O <sub>μ</sub>                   | 1.76 ± 0.04 | 1.73 ± 0.03 |
| Zn <sub>α</sub> -O <sub>H2O</sub>                 | 1.94 ± 0.07 |             |
| Zn <sub>β</sub> -O <sub>Lys169</sub>              | 1.76 ± 0.04 | 1.78 ± 0.04 |
| Zn <sub>β</sub> -N <sub>His201</sub>              | 2.42 ± 0.20 | 2.61 ± 0.22 |
| Zn <sub>β</sub> -N <sub>His230</sub>              | 2.01 ± 0.08 | 2.30 ± 0.18 |
| Zn <sub>β</sub> -O <sub>μ</sub>                   | 1.72 ± 0.03 | 1.73 ± 0.03 |
| Zn <sub>β</sub> -S <sub>DIN/O<sub>DON</sub></sub> | 3.30 ± 0.21 | 1.85 ± 0.06 |
| Zn <sub>β</sub> -O <sub>H2O</sub>                 | 1.87 ± 0.06 | 1.93 ± 0.07 |

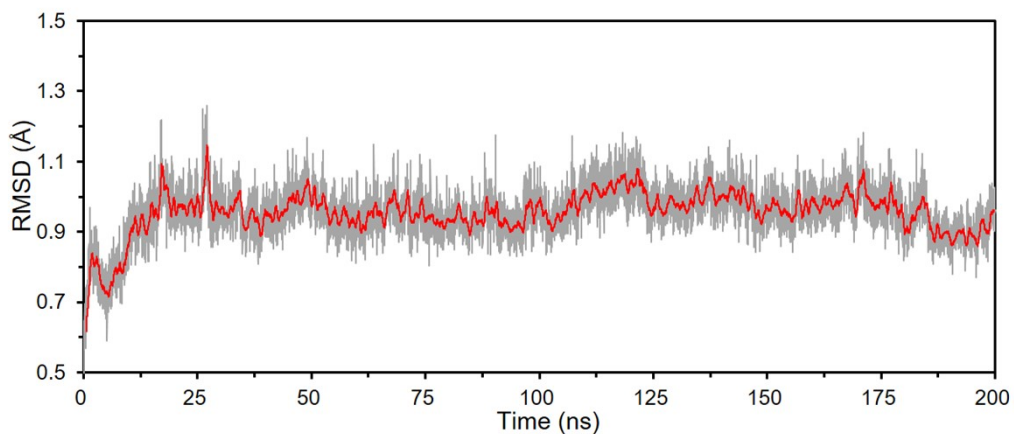

**Fig. S1** RMSD values of enzyme-DIN system for 200 ns MM MD simulations, the atoms were used to compute the RMSD includes residues 1-329@CA, C, N.

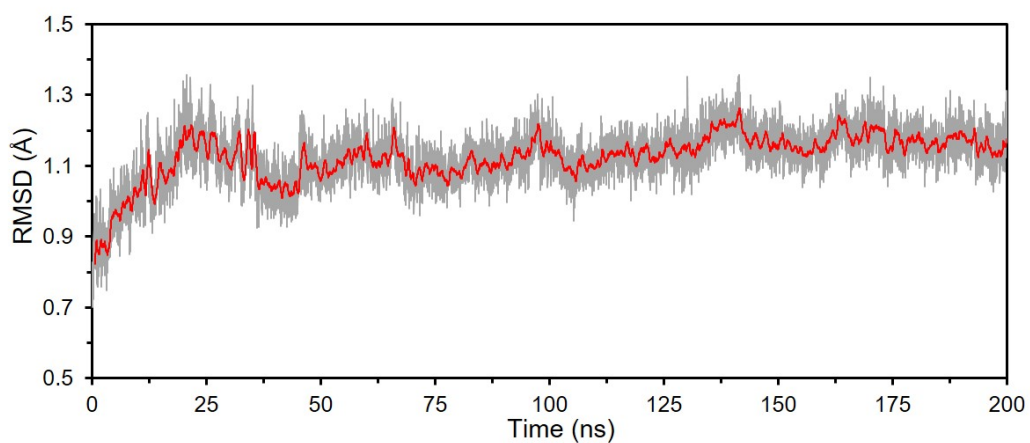

**Fig. S2** RMSD values of enzyme-DON system for 200 ns MM MD simulations, the atoms were used to compute the RMSD includes residues 1-329@CA, C, N.

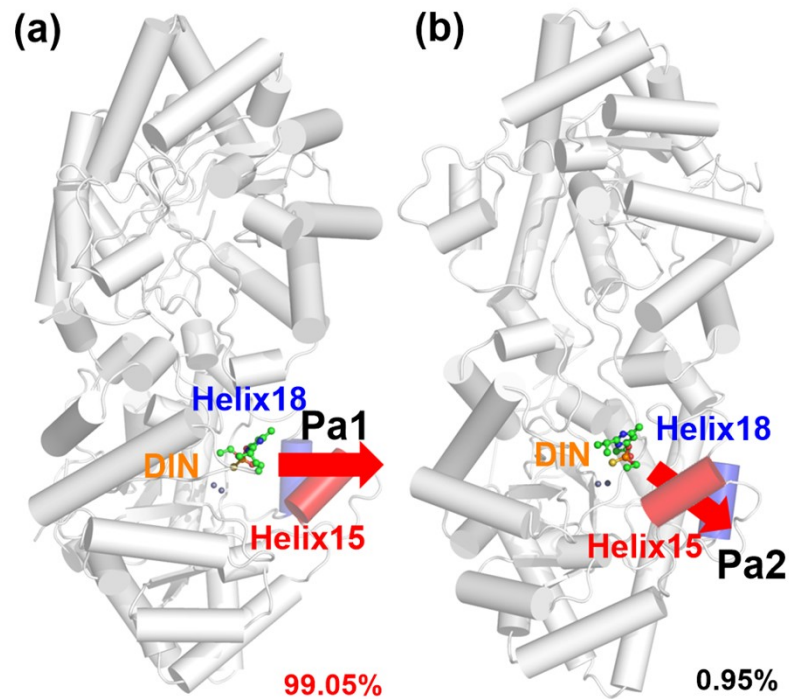

**Fig. S3** Possible channels for DIN delivery to the active site are predicted by RAMD-MD simulations. (a) represents for pathway 1 (Pa1) and (b) represents for pathway 2 (Pa2).

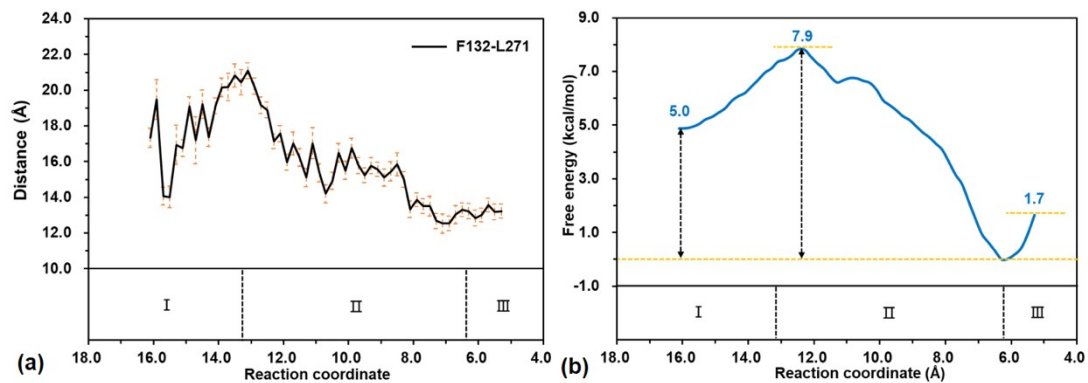

**Fig. S4** (A) The distance fluctuation of the delivery channel characterized by the distance between Phe132@CZ and Leu271@CG. (B) Free energy profile for the process of DIN enters into the active site.

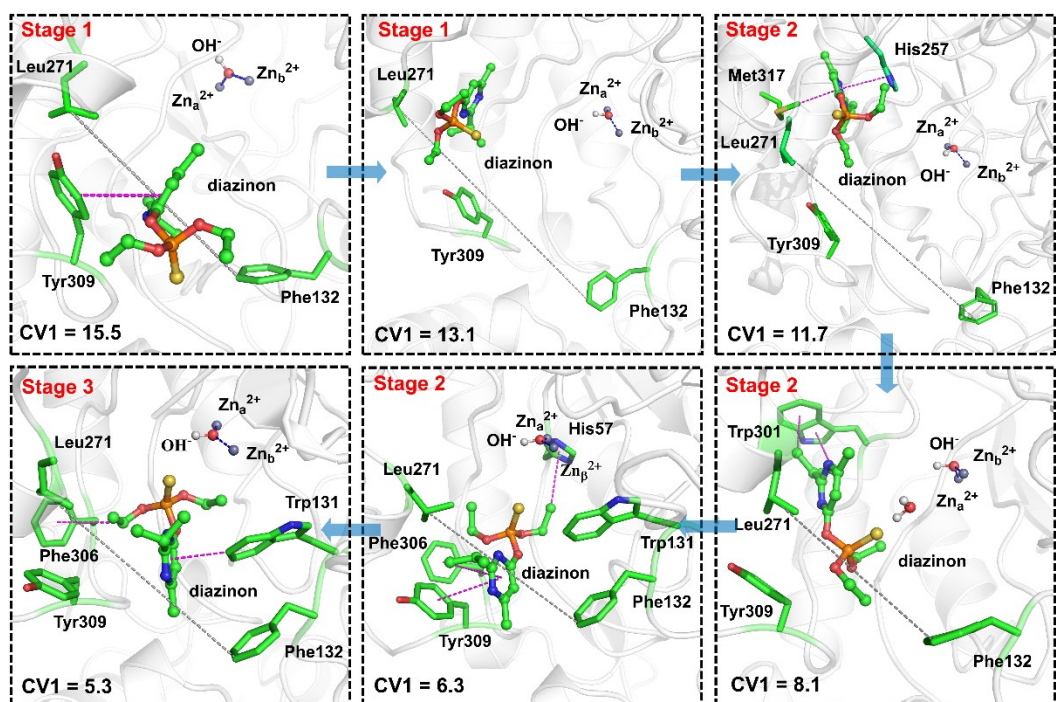

**Fig. S5** Representative structures and conformational changes of the delivery channel in the DIN transportation.

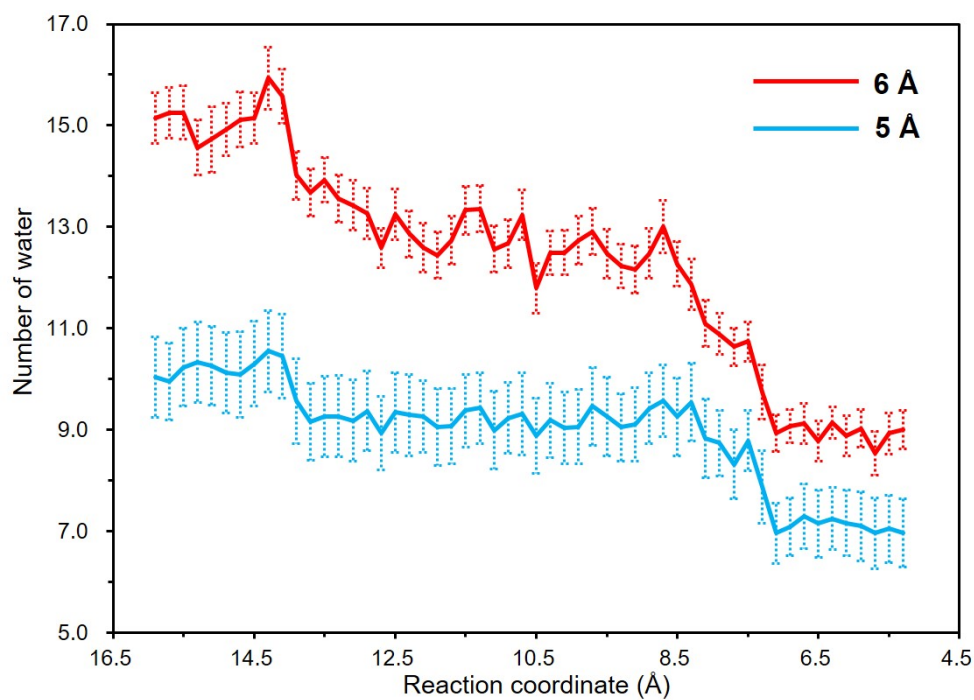

**Fig. S6** Statistics analysis of water molecules around two zinc ions within 5 Å (blue) and 6 Å (red) during the delivery of DIN from the bulk water to the active site PTE enzyme.

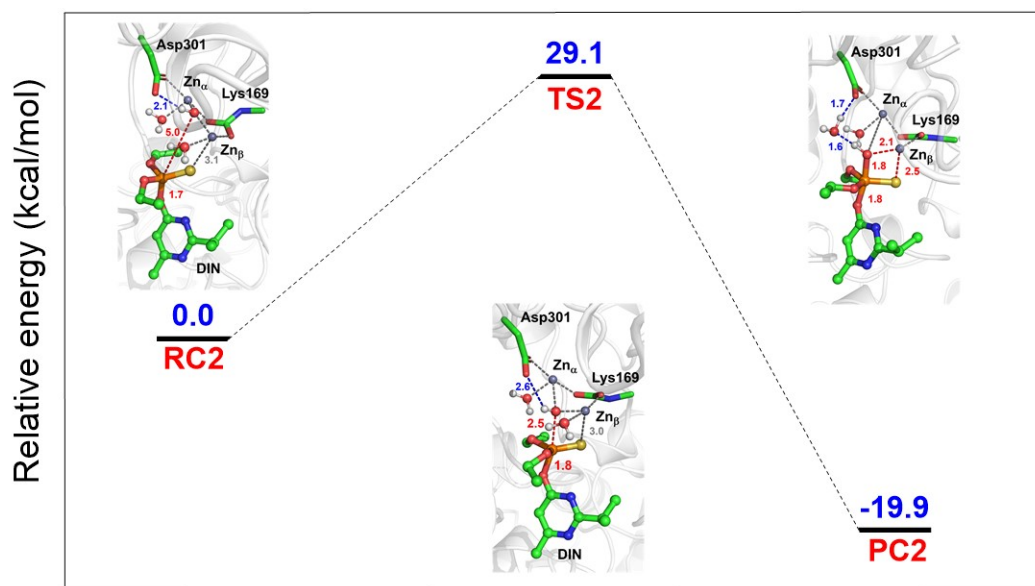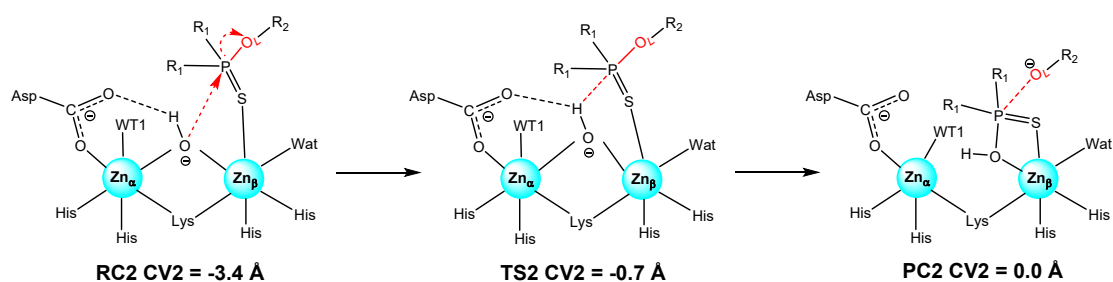

**Fig. S7** QM/MM (B3LYP/TZVP) relative energies (in kcal/mol) and representative structures for the degradation of DIN Model A (RC = reactant complex, TS = transition state, PC = product).

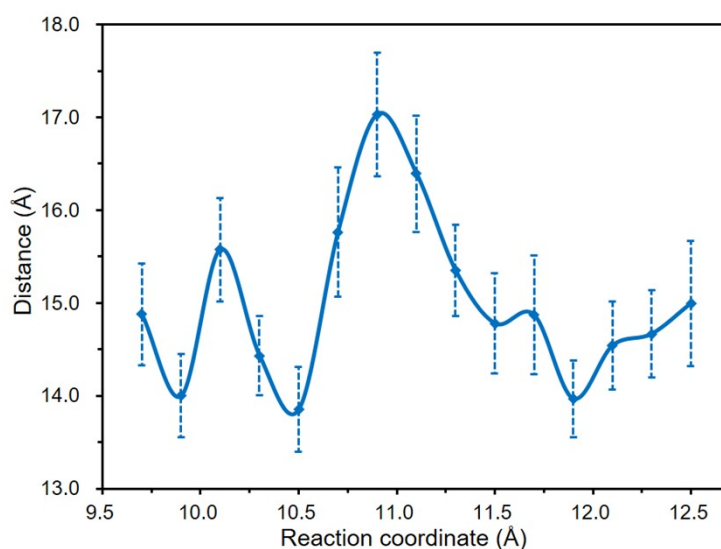

**Fig. S8** The distance fluctuation during the release of LEG characterized by the distance between Phe132@CZ and Leu271@CG.

### Cartesian coordinates of QM region from QM/MM calculations

#### RC1

|   |           |           |           |   |           |           |           |
|---|-----------|-----------|-----------|---|-----------|-----------|-----------|
| c | 54.852621 | 41.032149 | 51.150802 | n | 52.993789 | 45.251538 | 45.672527 |
| h | 55.678718 | 41.721615 | 51.383986 | c | 51.776430 | 44.585874 | 45.620943 |
| h | 55.303261 | 40.052834 | 50.921187 | o | 51.323088 | 44.363858 | 44.456685 |
| c | 54.112592 | 41.569621 | 49.960836 | o | 51.233752 | 44.247664 | 46.706561 |
| n | 54.812744 | 42.218612 | 48.953430 | h | 53.121470 | 45.740999 | 47.700625 |
| h | 55.819952 | 42.092484 | 48.757381 | h | 54.315772 | 46.549466 | 46.642084 |
| c | 53.931471 | 42.614484 | 48.008423 | h | 53.320075 | 45.530917 | 44.754237 |
| h | 54.212856 | 43.160890 | 47.110851 | c | 52.520671 | 46.065489 | 42.255576 |
| n | 52.700980 | 42.257610 | 48.341480 | h | 52.045621 | 45.908353 | 43.230220 |
| c | 52.793595 | 41.609579 | 49.557025 | h | 52.271646 | 47.076320 | 41.910537 |
| h | 51.909346 | 41.209920 | 50.045446 | c | 51.941259 | 45.071272 | 41.294677 |
| c | 46.642706 | 40.894279 | 50.180968 | n | 51.670143 | 43.741257 | 41.591588 |
| h | 46.589730 | 39.862688 | 49.813621 | c | 51.067127 | 43.223051 | 40.531471 |
| h | 45.654416 | 41.361384 | 50.034218 | h | 50.694794 | 42.206213 | 40.465414 |
| c | 47.692746 | 41.628918 | 49.421016 | n | 50.938409 | 44.148216 | 39.557625 |
| n | 47.835879 | 43.010155 | 49.432147 | h | 50.492619 | 44.024954 | 38.645472 |
| h | 47.303666 | 43.655693 | 50.005695 | c | 51.487626 | 45.324229 | 40.018838 |
| c | 48.862833 | 43.347951 | 48.614447 | h | 51.514266 | 46.227297 | 39.417454 |
| h | 49.205184 | 44.363130 | 48.420158 | c | 57.124250 | 40.993593 | 42.804643 |
| n | 49.379440 | 42.254327 | 48.085753 | h | 57.674497 | 41.803980 | 42.301037 |
| c | 48.670355 | 41.176601 | 48.567732 | h | 56.892515 | 40.234326 | 42.040406 |
| h | 48.928889 | 40.164708 | 48.267554 | c | 55.847205 | 41.520625 | 43.390539 |
| c | 47.955038 | 49.280833 | 45.297141 | n | 55.388917 | 41.265109 | 44.668805 |
| h | 48.449129 | 49.222738 | 46.282310 | h | 55.853545 | 40.663804 | 45.372517 |
| h | 46.881000 | 49.388397 | 45.505181 | c | 54.149329 | 41.777795 | 44.789913 |
| c | 48.186411 | 48.020114 | 44.510276 | h | 53.520852 | 41.655208 | 45.661855 |
| c | 49.352655 | 47.299778 | 44.349771 | n | 53.772273 | 42.367636 | 43.665724 |
| h | 50.345997 | 47.508175 | 44.736670 | c | 54.823033 | 42.228169 | 42.784324 |
| n | 49.137309 | 46.178391 | 43.574537 | h | 54.762518 | 42.583798 | 41.757863 |
| h | 49.770142 | 45.373033 | 43.586772 | c | 56.106966 | 35.686060 | 43.981347 |
| c | 47.804426 | 46.135605 | 43.227260 | h | 57.158112 | 35.802729 | 43.685150 |
| c | 47.097620 | 45.219081 | 42.436918 | h | 55.643027 | 34.965415 | 43.288964 |
| h | 47.616938 | 44.384103 | 41.966266 | c | 55.375638 | 36.978720 | 43.850211 |
| c | 45.725798 | 45.410351 | 42.286434 | n | 55.339041 | 37.688560 | 42.659084 |
| h | 45.146185 | 44.707561 | 41.681860 | h | 55.868425 | 37.459869 | 41.804367 |
| c | 45.065792 | 46.495595 | 42.910430 | c | 54.504181 | 38.731435 | 42.761527 |
| h | 43.986238 | 46.611453 | 42.778845 | h | 54.272172 | 39.453024 | 41.981507 |
| c | 45.772714 | 47.426510 | 43.668464 | n | 54.018687 | 38.719297 | 43.999949 |
| h | 45.256380 | 48.269843 | 44.137739 | h | 53.276531 | 39.298075 | 44.405259 |
| c | 47.165754 | 47.270573 | 43.814375 | c | 54.537713 | 37.658543 | 44.697365 |
| c | 53.273374 | 46.211075 | 46.721039 | h | 54.263873 | 37.468326 | 45.728434 |
|   |           |           |           | c | 52.425123 | 37.921498 | 47.748451 |

h 53.397249 38.324493 48.078816  
h 52.636554 37.041406 47.132861  
c 51.744968 39.023347 46.938879  
o 51.159202 39.945316 47.551328  
o 51.889214 38.984373 45.669175  
zn 51.077557 42.160072 46.995969  
zn 51.602061 42.590719 43.425503  
o 48.301296 40.937083 44.844080  
c 48.705247 39.616283 44.406566  
c 47.478423 38.769936 44.144980  
c 46.259343 43.428980 45.327988  
c 45.776688 42.240205 46.136916  
p 48.228444 42.235571 43.939203  
o 46.910410 41.982170 42.952957  
o 47.647139 43.317721 44.931008  
o 49.412159 42.688843 43.166768  
n 46.963698 39.937563 39.443837  
c 48.041700 40.069092 40.226556  
c 49.360066 39.471939 39.781362  
c 49.264799 37.951517 39.613775  
c 49.874049 40.152593 38.500257  
n 48.049133 40.721816 41.395258  
c 46.927617 41.311883 41.778904  
c 45.748120 41.247081 41.034864  
c 45.811235 40.514426 39.847455  
c 44.600727 40.358344 38.976595  
h 49.333520 39.704636 43.514345  
h 49.315958 39.215490 45.225231  
h 47.783716 37.761197 43.835894  
h 46.860226 39.198505 43.343229  
h 46.862357 38.686163 45.051219  
h 46.235558 44.351620 45.913362  
h 45.652528 43.591464 44.426237  
h 46.474794 42.010297 46.955581  
h 45.674182 41.343448 45.510189  
h 44.784750 42.472535 46.557620  
h 50.063341 39.702289 40.592817  
h 50.229392 37.532685 39.286891  
h 48.516900 37.695272 38.847421  
h 48.975585 37.465733 40.558612  
h 49.726243 41.244669 38.532861  
h 49.350746 39.766983 37.613749  
h 50.950382 39.961740 38.374872  
h 44.833876 41.729786 41.379771

h 44.632175 41.078239 38.143691  
h 43.681540 40.550264 39.546627  
h 44.571818 39.350769 38.538523  
o 51.295286 41.622508 45.156281  
h 51.414200 40.652505 45.179945  
o 51.257574 38.258233 43.065992  
h 51.350030 38.360562 44.037764  
h 50.600768 37.515207 42.952093  
o 53.312905 40.818355 40.127081  
h 53.472906 41.654106 39.610722  
h 53.675652 40.107608 39.549771  
o 51.639313 40.787133 42.219977  
h 51.396575 39.865071 42.476269  
h 52.244289 40.736996 41.443181  
h 54.292416 40.917662 52.078772  
h 46.853362 40.822248 51.247974  
h 48.292124 50.225062 44.869507  
h 52.611413 47.073443 46.642330  
h 53.597749 46.040575 42.420952  
h 57.804661 40.528795 43.518135  
h 56.074792 35.293084 44.997516  
h 51.921957 37.589053 48.656400

#### **TS1a**

c 54.830992 41.069488 51.122050  
h 55.653258 41.762427 51.358447  
h 55.288061 40.095390 50.884427  
c 54.088316 41.609568 49.932644  
n 54.793258 42.265310 48.933007  
h 55.800954 42.129288 48.746917  
c 53.917148 42.662075 47.982580  
h 54.206465 43.212494 47.089725  
n 52.685266 42.297241 48.301473  
c 52.772366 41.645278 49.517340  
h 51.886548 41.242826 50.000904  
c 46.639590 40.861455 50.200449  
h 46.606808 39.830441 49.828784  
h 45.649357 41.318259 50.036769  
c 47.696132 41.618031 49.475102  
n 47.814977 42.999190 49.513861  
h 47.258379 43.623253 50.088600  
c 48.857902 43.368196 48.731633  
h 49.182093 44.394658 48.568709  
n 49.403792 42.293220 48.196561



|   |           |           |           |    |           |           |           |
|---|-----------|-----------|-----------|----|-----------|-----------|-----------|
| c | 48.702496 | 41.194994 | 48.641632 | h  | 55.768453 | 40.567560 | 45.474156 |
| h | 48.970915 | 40.194223 | 48.313438 | c  | 54.034450 | 41.654788 | 44.910515 |
| c | 47.945533 | 49.280113 | 45.288752 | h  | 53.410460 | 41.480267 | 45.779413 |
| h | 48.409756 | 49.236380 | 46.289245 | n  | 53.670788 | 42.292901 | 43.809820 |
| h | 46.865451 | 49.382478 | 45.464987 | c  | 54.734034 | 42.209037 | 42.936822 |
| c | 48.206750 | 48.005617 | 44.531988 | h  | 54.675225 | 42.596934 | 41.922854 |
| c | 49.386887 | 47.299227 | 44.413264 | c  | 56.100107 | 35.676972 | 43.987582 |
| h | 50.374610 | 47.552832 | 44.785965 | h  | 57.152168 | 35.796310 | 43.696045 |
| n | 49.194466 | 46.132584 | 43.702518 | h  | 55.642270 | 34.952438 | 43.294877 |
| h | 49.858480 | 45.352859 | 43.717978 | c  | 55.365618 | 36.964852 | 43.842277 |
| c | 47.865651 | 46.048210 | 43.347577 | n  | 55.376254 | 37.679171 | 42.655408 |
| c | 47.182722 | 45.067263 | 42.614591 | h  | 55.925328 | 37.444363 | 41.814707 |
| h | 47.712658 | 44.194062 | 42.231683 | c  | 54.526646 | 38.710722 | 42.721831 |
| c | 45.814355 | 45.243314 | 42.418653 | h  | 54.323845 | 39.433571 | 41.936411 |
| h | 45.251745 | 44.496555 | 41.852510 | n  | 53.984316 | 38.690392 | 43.935955 |
| c | 45.136214 | 46.365319 | 42.951288 | h  | 53.224883 | 39.277876 | 44.296221 |
| h | 44.059962 | 46.465021 | 42.785716 | c  | 54.484590 | 37.632828 | 44.655147 |
| c | 45.817086 | 47.343309 | 43.671732 | h  | 54.179629 | 37.435544 | 45.676026 |
| h | 45.283260 | 48.206165 | 44.082301 | c  | 52.343171 | 37.979134 | 47.584096 |
| c | 47.206920 | 47.207962 | 43.859716 | h  | 53.352554 | 38.325226 | 47.864488 |
| c | 53.306600 | 46.217041 | 46.689362 | h  | 52.472684 | 37.085148 | 46.966801 |
| n | 53.044950 | 45.292479 | 45.603429 | c  | 51.695505 | 39.122558 | 46.793050 |
| c | 51.865855 | 44.573550 | 45.534086 | o  | 51.204551 | 40.079903 | 47.442630 |
| o | 51.423689 | 44.341623 | 44.367416 | o  | 51.773742 | 39.103765 | 45.520321 |
| o | 51.334635 | 44.198997 | 46.613972 | zn | 50.996409 | 42.206721 | 46.974907 |
| h | 53.161706 | 45.710415 | 47.651638 | zn | 51.640814 | 42.595527 | 43.296502 |
| h | 54.342465 | 46.576453 | 46.623002 | o  | 48.660619 | 40.332917 | 44.730286 |
| h | 53.365324 | 45.608741 | 44.694935 | c  | 48.555584 | 39.031300 | 44.124950 |
| c | 52.534472 | 46.096057 | 42.194751 | c  | 47.117346 | 38.574012 | 43.993509 |
| h | 52.044679 | 45.942675 | 43.162052 | c  | 47.012362 | 43.211186 | 45.543246 |
| h | 52.283014 | 47.102093 | 41.841186 | c  | 46.179477 | 42.096369 | 46.146156 |
| c | 51.982396 | 45.091917 | 41.227550 | p  | 48.846014 | 41.798443 | 44.093203 |
| n | 51.799248 | 43.741280 | 41.498026 | o  | 47.264841 | 41.740714 | 43.223687 |
| c | 51.186936 | 43.213158 | 40.446857 | o  | 48.364245 | 42.804450 | 45.232992 |
| h | 50.858559 | 42.180934 | 40.370800 | o  | 49.631657 | 42.393358 | 42.938670 |
| n | 50.973116 | 44.150964 | 39.503386 | n  | 46.971132 | 40.004155 | 39.553215 |
| h | 50.503950 | 44.023257 | 38.603239 | c  | 48.089804 | 40.016959 | 40.287000 |
| c | 51.472310 | 45.345608 | 39.974366 | c  | 49.365049 | 39.403100 | 39.739209 |
| h | 51.422308 | 46.261606 | 39.395211 | c  | 49.227688 | 37.893114 | 39.526389 |
| c | 57.036770 | 40.992781 | 42.909219 | c  | 49.841997 | 40.129850 | 38.472769 |
| h | 57.559464 | 41.820721 | 42.405055 | n  | 48.197697 | 40.552565 | 41.500702 |
| h | 56.798618 | 40.244838 | 42.136234 | c  | 47.152715 | 41.198869 | 42.019079 |
| c | 55.758874 | 41.489983 | 43.524339 | c  | 45.932449 | 41.260341 | 41.314760 |
| n | 55.288218 | 41.172844 | 44.784129 | c  | 45.879936 | 40.610392 | 40.080418 |

c 44.612062 40.555607 39.276037  
h 49.062167 39.036707 43.155639  
h 49.107762 38.373098 44.809306  
h 47.112415 37.531866 43.637424  
h 46.547930 39.182710 43.280099  
h 46.608349 38.618962 44.965493  
h 47.157055 44.028082 46.260884  
h 46.538832 43.629721 44.646618  
h 46.718749 41.616944 46.975159  
h 45.935568 41.335108 45.392889  
h 45.233574 42.514976 46.528999  
h 50.110625 39.581741 40.526802  
h 50.172945 37.453766 39.171545  
h 48.454268 37.676160 38.773125  
h 48.945502 37.392899 40.466096  
h 49.745254 41.222965 38.578222  
h 49.253359 39.825418 37.596457  
h 50.898736 39.898326 38.270312  
h 45.063697 41.769014 41.734877  
h 44.705605 41.171451 38.368173  
h 43.751568 40.922594 39.850845  
h 44.422923 39.523374 38.943869  
o 50.690348 41.679725 45.042377  
h 50.928449 40.721616 45.090562  
o 51.345054 38.110271 42.807526  
h 51.408720 38.287596 43.768029  
h 50.617665 37.425370 42.755585  
o 53.494561 40.898731 40.097801  
h 53.610567 41.724200 39.551923  
h 53.801118 40.170663 39.508002  
o 51.947599 40.692225 42.238832  
h 51.515116 39.812976 42.312942  
h 52.468770 40.713233 41.400010  
h 54.277039 40.943674 52.052304  
h 46.843633 40.797306 51.269242  
h 48.288602 50.224187 44.865558  
h 52.628659 47.068804 46.634946  
h 53.608951 46.076018 42.376850  
h 57.741746 40.528351 43.598697  
h 56.065307 35.287260 45.004921  
h 51.872865 37.673563 48.518712

**IM1**

c 54.861591 41.063120 51.154553

h 55.680270 41.759936 51.393202  
h 55.322370 40.087293 50.929359  
c 54.129652 41.584607 49.952943  
n 54.838967 42.168608 48.912948  
h 55.846961 42.027514 48.725993  
c 53.965042 42.546376 47.955506  
h 54.257567 43.043976 47.033791  
n 52.726947 42.240866 48.313264  
c 52.809995 41.646044 49.558062  
h 51.918716 41.292375 50.068179  
c 46.566173 40.913083 50.257457  
h 46.499645 39.898131 49.848373  
h 45.580564 41.393494 50.144373  
c 47.623425 41.683801 49.547919  
n 47.736982 43.065561 49.591514  
h 47.145715 43.686585 50.134057  
c 48.833734 43.432787 48.884844  
h 49.155871 44.461241 48.730522  
n 49.420842 42.355600 48.395945  
c 48.686812 41.260212 48.794181  
h 48.992140 40.257792 48.514101  
c 47.943203 49.273891 45.248759  
h 48.373360 49.227087 46.264317  
h 46.856651 49.360508 45.389938  
c 48.249116 48.006542 44.492980  
c 49.453826 47.341085 44.386492  
h 50.430549 47.637518 44.759676  
n 49.302431 46.153597 43.697102  
h 49.983300 45.389241 43.735631  
c 47.976234 46.012105 43.350798  
c 47.326711 44.975239 42.663109  
h 47.891424 44.111949 42.302454  
c 45.949230 45.086566 42.481712  
h 45.407435 44.297406 41.953769  
c 45.234239 46.202198 42.977967  
h 44.152970 46.249615 42.824113  
c 45.882353 47.233266 43.653229  
h 45.316821 48.086638 44.040122  
c 47.277692 47.159700 43.835662  
c 53.341111 46.122682 46.743255  
n 53.093620 45.181552 45.667233  
c 51.887832 44.510793 45.564510  
o 51.477459 44.296750 44.381573  
o 51.291390 44.176013 46.623027

|    |           |           |           |    |           |           |           |
|----|-----------|-----------|-----------|----|-----------|-----------|-----------|
| h  | 53.174767 | 45.632110 | 47.709984 | zn | 51.778834 | 42.710013 | 43.136790 |
| h  | 54.381838 | 46.469347 | 46.689001 | o  | 49.775045 | 39.769391 | 44.367011 |
| h  | 53.451064 | 45.477259 | 44.765476 | c  | 48.896845 | 38.653610 | 44.567808 |
| c  | 52.519332 | 46.181456 | 42.207441 | c  | 48.072485 | 38.781086 | 45.827698 |
| h  | 52.039865 | 45.988253 | 43.173596 | c  | 47.627167 | 42.945115 | 45.489597 |
| h  | 52.280891 | 47.209052 | 41.910880 | c  | 46.230439 | 42.448951 | 45.795157 |
| c  | 51.951500 | 45.238581 | 41.192413 | p  | 49.429551 | 41.356028 | 44.328934 |
| n  | 51.758368 | 43.880668 | 41.405807 | o  | 47.842449 | 40.999567 | 43.492327 |
| c  | 51.144313 | 43.399365 | 40.332762 | o  | 48.613908 | 41.896978 | 45.618251 |
| h  | 50.824040 | 42.371759 | 40.195853 | o  | 49.806819 | 42.355482 | 43.226404 |
| n  | 50.943067 | 44.374998 | 39.428575 | n  | 47.524510 | 39.768389 | 39.638082 |
| h  | 50.479533 | 44.276375 | 38.520662 | c  | 48.675728 | 39.735932 | 40.313169 |
| c  | 51.449176 | 45.545264 | 39.948041 | c  | 49.887148 | 39.125176 | 39.633257 |
| h  | 51.415975 | 46.480614 | 39.400559 | c  | 49.630424 | 37.646224 | 39.318440 |
| c  | 57.080335 | 40.872137 | 42.836614 | c  | 50.324586 | 39.918772 | 38.398198 |
| h  | 57.599117 | 41.684789 | 42.303922 | n  | 48.848928 | 40.174775 | 41.570205 |
| h  | 56.860630 | 40.081545 | 42.101235 | c  | 47.768946 | 40.640386 | 42.233398 |
| c  | 55.792453 | 41.379648 | 43.405892 | c  | 46.518512 | 40.716770 | 41.582428 |
| n  | 55.290962 | 41.093310 | 44.660581 | c  | 46.438764 | 40.279960 | 40.268226 |
| h  | 55.748648 | 40.497457 | 45.375433 | c  | 45.158386 | 40.365550 | 39.486831 |
| c  | 54.052874 | 41.609977 | 44.760034 | h  | 48.275640 | 38.493453 | 43.675143 |
| h  | 53.412995 | 41.455960 | 45.617438 | h  | 49.593845 | 37.811867 | 44.651514 |
| n  | 53.720434 | 42.228886 | 43.635227 | h  | 47.531541 | 37.838600 | 46.002048 |
| c  | 54.797152 | 42.103401 | 42.780282 | h  | 47.343753 | 39.598425 | 45.751310 |
| h  | 54.769131 | 42.477018 | 41.759640 | h  | 48.732139 | 38.969937 | 46.684993 |
| c  | 56.118778 | 35.695002 | 43.973997 | h  | 47.946286 | 43.732227 | 46.188501 |
| h  | 57.169274 | 35.868354 | 43.701858 | h  | 47.671737 | 43.366505 | 44.480360 |
| h  | 55.712598 | 34.951931 | 43.269075 | h  | 46.159168 | 42.062609 | 46.824768 |
| c  | 55.309887 | 36.939856 | 43.821341 | h  | 45.950954 | 41.650973 | 45.094288 |
| n  | 55.210260 | 37.608841 | 42.609157 | h  | 45.515321 | 43.277758 | 45.669018 |
| h  | 55.761411 | 37.400546 | 41.763340 | h  | 50.700952 | 39.148115 | 40.367319 |
| c  | 54.283792 | 38.574514 | 42.685050 | h  | 50.536166 | 37.183228 | 38.903370 |
| h  | 53.990310 | 39.251529 | 41.888576 | h  | 48.817947 | 37.523511 | 38.586094 |
| n  | 53.803034 | 38.558756 | 43.923473 | h  | 49.366005 | 37.103162 | 40.237688 |
| h  | 53.033684 | 39.097804 | 44.339889 | h  | 50.565361 | 40.962947 | 38.652108 |
| c  | 54.426898 | 37.579178 | 44.654480 | h  | 49.538310 | 39.925271 | 37.629694 |
| h  | 54.179023 | 37.405233 | 45.695476 | h  | 51.228582 | 39.474791 | 37.959139 |
| c  | 52.443264 | 38.032240 | 47.826618 | h  | 45.656356 | 41.118787 | 42.114981 |
| h  | 53.428123 | 38.370545 | 48.189340 | h  | 45.282048 | 41.056753 | 38.638566 |
| h  | 52.635545 | 37.209261 | 47.129921 | h  | 44.327241 | 40.727568 | 40.107264 |
| c  | 51.826621 | 39.222328 | 47.102564 | h  | 44.895835 | 39.382877 | 39.064171 |
| o  | 51.055773 | 40.014832 | 47.706905 | o  | 50.983590 | 41.551995 | 45.194228 |
| o  | 52.210831 | 39.417592 | 45.907610 | h  | 51.407566 | 40.638251 | 45.346619 |
| zn | 50.990230 | 42.194292 | 47.141326 | o  | 51.235524 | 37.739523 | 42.332618 |

h 50.922439 38.612959 42.609141  
h 50.500634 37.111260 42.565073  
o 53.256554 40.862235 40.005405  
h 53.438965 41.692393 39.486947  
h 53.641670 40.139380 39.455780  
o 51.663532 40.776594 42.095850  
h 50.710715 40.604471 41.893996  
h 52.186853 40.728106 41.256913  
h 54.295645 40.943063 52.078326  
h 46.805983 40.808297 51.315558  
h 48.288909 50.226102 44.846456  
h 52.673233 46.980436 46.664108  
h 53.594310 46.134645 42.381498  
h 57.783066 40.453645 43.557100  
h 56.082331 35.298191 44.988531  
h 51.922069 37.632410 48.696422

**TS1b**

c 54.854533 41.047310 51.151172  
h 55.673991 41.743213 51.388095  
h 55.312867 40.071197 50.924541  
c 54.119177 41.575184 49.955016  
n 54.820979 42.218860 48.945890  
h 55.830359 42.095435 48.758676  
c 53.944598 42.602061 47.992117  
h 54.231676 43.142154 47.092918  
n 52.713995 42.239991 48.320939  
c 52.802949 41.603970 49.544170  
h 51.917565 41.204669 50.030556  
c 46.576154 40.884175 50.232899  
h 46.511591 39.860401 49.847507  
h 45.590466 41.362054 50.108576  
c 47.631444 41.635411 49.501082  
n 47.782138 43.012474 49.569619  
h 47.224084 43.638775 50.140560  
c 48.858876 43.368843 48.830250  
h 49.204681 44.391353 48.689148  
n 49.398741 42.289288 48.296867  
c 48.650931 41.202396 48.690838  
h 48.904544 40.199876 48.356683  
c 47.943113 49.271307 45.251834  
h 48.378910 49.222072 46.264886  
h 46.857473 49.360189 45.398734  
c 48.241590 48.005159 44.490812

c 49.442375 47.333626 44.379589  
h 50.420319 47.621320 44.755313  
n 49.285302 46.156765 43.672857  
h 49.959190 45.387652 43.696721  
c 47.958959 46.029829 43.317821  
c 47.307056 45.010753 42.606879  
h 47.863262 44.144315 42.240732  
c 45.932304 45.136643 42.417800  
h 45.390731 44.358845 41.873461  
c 45.221740 46.246602 42.933050  
h 44.141613 46.304429 42.774155  
c 45.872268 47.259214 43.633498  
h 45.310276 48.108221 44.034943  
c 47.266694 47.173531 43.819087  
c 53.309363 46.124226 46.716390  
n 53.062886 45.207635 45.619638  
c 51.892881 44.481136 45.530678  
o 51.463294 44.254831 44.359833  
o 51.342234 44.098218 46.599899  
h 53.141269 45.611003 47.671019  
h 54.348944 46.475603 46.671908  
h 53.393728 45.529875 44.716780  
c 52.518410 46.126519 42.164906  
h 52.026231 45.948796 43.127372  
h 52.272276 47.145489 41.846941  
c 51.962185 45.160487 41.161113  
n 51.783554 43.802795 41.391439  
c 51.152667 43.299342 40.338118  
h 50.822472 42.268705 40.239118  
n 50.928071 44.262659 39.426940  
h 50.448600 44.152227 38.528553  
c 51.434422 45.444659 39.921986  
h 51.374053 46.373813 39.366018  
c 57.072356 40.969053 42.877923  
h 57.610217 41.780647 42.362976  
h 56.832041 40.207317 42.119237  
c 55.797426 41.497698 43.463981  
n 55.303641 41.225095 44.725274  
h 55.757289 40.619471 45.434039  
c 54.063814 41.745700 44.823337  
h 53.428700 41.611982 45.689563  
n 53.729894 42.360163 43.699145  
c 54.800568 42.223970 42.841907  
h 54.765052 42.582992 41.816132

c 56.110043 35.672362 43.981237  
h 57.162647 35.786886 43.690101  
h 55.649711 34.947226 43.291156  
c 55.380933 36.961723 43.827626  
n 55.369787 37.647109 42.624135  
h 55.906106 37.388851 41.782214  
c 54.528579 38.685026 42.682423  
h 54.311085 39.389642 41.885373  
n 54.013663 38.698047 43.908340  
h 53.277516 39.305719 44.275918  
c 54.524274 37.656470 44.643746  
h 54.239450 37.489614 45.675835  
c 52.407082 37.991365 47.667272  
h 53.407510 38.333004 47.981875  
h 52.559140 37.129811 47.009922  
c 51.773286 39.159557 46.922752  
o 51.148255 40.032538 47.576346  
o 51.991727 39.256598 45.668251  
zn 50.994475 42.151320 47.097336  
zn 51.741950 42.665036 43.111325  
o 49.375222 39.831492 44.391302  
c 48.507680 38.734803 44.066251  
c 47.150654 38.767429 44.731476  
c 47.429583 43.016789 45.427195  
c 46.112187 42.420907 45.877308  
p 49.345630 41.434097 44.309610  
o 47.477284 41.276377 43.308742  
o 48.506436 42.061281 45.531032  
o 49.761234 42.343542 43.153153  
n 47.208169 39.930526 39.498126  
c 48.342768 39.919218 40.210182  
c 49.591181 39.325589 39.575148  
c 49.410709 37.831266 39.285719  
c 50.027971 40.108764 38.331310  
n 48.489056 40.367375 41.454893  
c 47.412689 40.903611 42.080250  
c 46.178236 40.988073 41.379775  
c 46.115104 40.470449 40.098166  
c 44.827475 40.477389 39.322364  
h 48.449071 38.644468 42.975902  
h 49.069647 37.880992 44.460109  
h 46.704913 37.761176 44.656351  
h 46.474716 39.496659 44.272779  
h 47.273487 39.020168 45.793884

h 47.734108 43.866334 46.057873  
h 47.348855 43.371223 44.396908  
h 46.155806 42.076326 46.923903  
h 45.845032 41.574886 45.231017  
h 45.319870 43.181859 45.781248  
h 50.376447 39.432835 40.336626  
h 50.324339 37.395885 38.853333  
h 48.589140 37.665397 38.571900  
h 49.175000 37.285662 40.213491  
h 50.066928 41.191774 38.533687  
h 49.324275 39.954811 37.501062  
h 51.027367 39.789715 38.000059  
h 45.307402 41.425860 41.869559  
h 44.918361 41.106474 38.423824  
h 43.998549 40.865367 39.930142  
h 44.579770 39.460299 38.979379  
o 50.808732 41.458442 45.139922  
h 51.210889 40.516163 45.239083  
o 51.330588 38.061814 42.631085  
h 51.363772 38.305828 43.571377  
h 50.639137 37.337936 42.628013  
o 53.427525 40.925402 40.045089  
h 53.544784 41.746275 39.492457  
h 53.757823 40.193194 39.471595  
o 52.014099 40.701457 42.249299  
h 51.369310 39.963469 42.233201  
h 52.471664 40.716489 41.369899  
h 54.288233 40.929454 52.075012  
h 46.812391 40.799634 51.293612  
h 48.288432 50.223233 44.848527  
h 52.637616 46.980315 46.653673  
h 53.591249 46.098184 42.355380  
h 57.764575 40.511341 43.584605  
h 56.071870 35.286182 44.999802  
h 51.908325 37.651045 48.574736

**PC1**

c 54.886167 41.088258 51.231714  
h 55.717297 41.766912 51.479039  
h 55.328392 40.109995 50.982111  
c 54.149090 41.648206 50.055024  
n 54.844358 42.201184 48.989577  
h 55.842736 42.033679 48.771429  
c 53.956501 42.636933 48.073729

h 54.233152 43.125718 47.141592  
n 52.719157 42.397492 48.488806  
c 52.819771 41.785843 49.721833  
h 51.933063 41.476195 50.267743  
c 46.573754 40.826275 50.278053  
h 46.578613 39.810256 49.865740  
h 45.560626 41.242445 50.154806  
c 47.585796 41.674026 49.592391  
n 47.595993 43.058902 49.664768  
h 46.936340 43.619033 50.196901  
c 48.689930 43.518372 49.014113  
h 48.946031 44.570141 48.894030  
n 49.374387 42.494511 48.529484  
c 48.700961 41.340073 48.871970  
h 49.075922 40.364526 48.584753  
c 47.940892 49.275809 45.237072  
h 48.354679 49.232747 46.259768  
h 46.851971 49.357829 45.361230  
c 48.263362 48.005994 44.491637  
c 49.477549 47.357490 44.393132  
h 50.451520 47.678458 44.753519  
n 49.339034 46.152004 43.731726  
h 50.022950 45.394575 43.787120  
c 48.011654 45.979748 43.401338  
c 47.374399 44.910958 42.752988  
h 47.943582 44.040698 42.416625  
c 45.995214 44.997623 42.573360  
h 45.464392 44.181473 42.076441  
c 45.268422 46.121915 43.031574  
h 44.186656 46.150670 42.877450  
c 45.904217 47.182239 43.672426  
h 45.328349 48.039818 44.033961  
c 47.300506 47.130758 43.856903  
c 53.406896 46.231393 46.736479  
n 53.155349 45.249755 45.698242  
c 51.940147 44.599942 45.613491  
o 51.549518 44.281803 44.456462  
o 51.306806 44.396699 46.694673  
h 53.258664 45.774710 47.723449  
h 54.444301 46.580832 46.656126  
h 53.550960 45.474237 44.791991  
c 52.499049 46.179572 42.215846  
h 52.031250 45.993232 43.188121  
h 52.265740 47.210491 41.926292  
c 51.900902 45.248580 41.205503  
n 51.615359 43.909978 41.441517  
c 50.996216 43.440417 40.363897  
h 50.613078 42.431053 40.246427  
n 50.878587 44.407020 39.437946  
h 50.425587 44.316392 38.522975  
c 51.445297 45.555168 39.943383  
h 51.486395 46.477791 39.374742  
c 57.038230 40.865135 42.863383  
h 57.554093 41.681908 42.333513  
h 56.828204 40.077029 42.122743  
c 55.740255 41.367652 43.419596  
n 55.251980 41.152148 44.693845  
h 55.714049 40.582897 45.427322  
c 54.008527 41.665248 44.773308  
h 53.374619 41.596999 45.647170  
n 53.659588 42.208121 43.613574  
c 54.730731 42.040569 42.759107  
h 54.690094 42.344992 41.716172  
c 56.086642 35.727131 44.005474  
h 57.136428 35.896989 43.725503  
h 55.676134 34.984524 43.302487  
c 55.280677 36.974924 43.830791  
n 55.209068 37.601590 42.592689  
h 55.777995 37.357558 41.767216  
c 54.286677 38.568703 42.608416  
h 53.998511 39.211885 41.781033  
n 53.780717 38.606212 43.837931  
h 52.971381 39.156337 44.115620  
c 54.383754 37.647488 44.624287  
h 54.118676 37.511179 45.666472  
c 52.529025 37.961707 48.102315  
h 53.491640 38.302748 48.516365  
h 52.755088 37.191247 47.358705  
c 51.866942 39.163235 47.487708  
o 51.114292 39.920909 48.087610  
o 52.237082 39.391673 46.238440  
zn 51.013138 42.543647 47.385595  
zn 51.720030 42.715220 43.106948  
o 49.884698 39.787549 44.685566  
c 49.013050 38.651485 44.569007  
c 47.956350 38.608414 45.644809  
c 47.622833 42.826710 45.544447  
c 46.207379 42.383827 45.830808

p 49.740336 41.364417 44.824280  
o 47.652484 40.829547 43.415278  
o 48.556228 41.753988 45.827137  
o 49.841344 42.266714 43.605622  
n 47.564626 39.832156 39.491314  
c 48.678880 39.816674 40.225041  
c 49.921705 39.234723 39.561757  
c 49.700786 37.745661 39.264168  
c 50.350792 40.018531 38.317936  
n 48.804068 40.212491 41.501046  
c 47.656081 40.615609 42.182561  
c 46.452378 40.730016 41.401943  
c 46.439026 40.319240 40.091775  
c 45.185064 40.369875 39.262953  
h 48.580177 38.635981 43.564240  
h 49.706894 37.808214 44.669764  
h 47.339238 37.708217 45.496008  
h 47.308154 39.490522 45.582975  
h 48.418406 38.553419 46.642883  
h 47.931787 43.678644 46.171063  
h 47.724243 43.116987 44.495855  
h 46.084127 42.072002 46.881352  
h 45.949450 41.550981 45.162973  
h 45.518932 43.218678 45.622194  
h 50.738126 39.292062 40.292080  
h 50.613027 37.291343 38.851599  
h 48.886869 37.601311 38.537708  
h 49.442928 37.207856 40.188922  
h 50.575024 41.069895 38.560611  
h 49.560376 40.004983 37.554044  
h 51.261418 39.583332 37.881681  
h 45.553666 41.096715 41.899834  
h 45.318090 41.052972 38.410353  
h 44.326193 40.718944 39.853352  
h 44.955771 39.375531 38.845681  
o 51.071803 41.576175 45.682820  
h 51.734527 40.233577 45.934728  
o 51.266823 37.751495 42.369863  
h 50.824753 38.612846 42.362768  
h 50.545910 37.101467 42.593791  
o 53.194771 40.863747 40.061382  
h 53.348418 41.693497 39.533089  
h 53.574066 40.149229 39.496803  
o 51.473496 40.829618 42.093641

h 50.491248 40.641816 41.929356  
h 51.988655 40.730517 41.258569  
h 54.315329 40.961331 52.151551  
h 46.815189 40.740475 51.337493  
h 48.289229 50.229025 44.839446  
h 52.733086 47.083053 46.643080  
h 53.575223 46.128781 42.381187  
h 57.745639 40.450968 43.581787  
h 56.063310 35.320620 45.016548  
h 51.974113 37.516824 48.928280

## RC2

c 19.286895 46.935336 59.231282  
h 19.039216 47.847157 59.798577  
h 18.889331 46.083275 59.802677  
c 20.777756 46.834818 59.059829  
n 21.625013 47.159294 60.111750  
h 21.348813 47.197310 61.107481  
c 22.903715 47.022160 59.678913  
h 23.775564 47.210250 60.295334  
n 22.941552 46.628226 58.420083  
c 21.627019 46.501937 58.019282  
h 21.386893 46.178190 57.009000  
c 23.246194 44.959304 52.217543  
h 23.382776 43.868247 52.214949  
h 23.900455 45.381884 51.435877  
c 23.651929 45.477402 53.554353  
n 24.140677 46.753877 53.758624  
h 24.250177 47.465061 53.033648  
c 24.485145 46.870648 55.062866  
h 24.968383 47.738094 55.502572  
n 24.227482 45.745857 55.706311  
c 23.706722 44.864533 54.787094  
h 23.425762 43.850802 55.058837  
c 29.612100 52.526756 57.446890  
h 28.555492 52.843498 57.499587  
h 29.901519 52.603546 56.387022  
c 29.756054 51.089571 57.855994  
c 29.112946 50.397066 58.861059  
h 28.406558 50.761955 59.604414  
n 29.462451 49.060726 58.834404  
h 28.906286 48.340778 59.299135  
c 30.327188 48.849624 57.780103  
c 30.956580 47.680681 57.330991

|   |           |           |           |    |           |           |           |
|---|-----------|-----------|-----------|----|-----------|-----------|-----------|
| h | 30.809496 | 46.737773 | 57.852678 | c  | 24.986925 | 42.534695 | 63.288426 |
| c | 31.765862 | 47.770619 | 56.200420 | h  | 26.003530 | 42.911061 | 63.344278 |
| h | 32.263083 | 46.868465 | 55.832163 | n  | 24.224974 | 42.510510 | 62.200880 |
| c | 31.955915 | 48.999734 | 55.527335 | h  | 24.427477 | 42.761357 | 61.212518 |
| h | 32.591570 | 49.035148 | 54.641252 | c  | 22.992705 | 41.990644 | 62.509704 |
| c | 31.351227 | 50.166971 | 55.988498 | h  | 22.219386 | 41.892412 | 61.755571 |
| h | 31.510843 | 51.113324 | 55.466253 | c  | 21.668115 | 42.512301 | 59.120686 |
| c | 30.533422 | 50.107703 | 57.135717 | h  | 21.151521 | 43.292679 | 59.706518 |
| c | 25.357131 | 50.044784 | 59.067897 | h  | 21.711781 | 41.619267 | 59.752335 |
| n | 25.456619 | 48.866277 | 58.247473 | c  | 23.068545 | 43.029850 | 58.795456 |
| c | 26.227967 | 47.766822 | 58.479923 | o  | 23.224139 | 43.785785 | 57.818804 |
| o | 26.875518 | 47.722255 | 59.589276 | o  | 24.006300 | 42.683668 | 59.600391 |
| o | 26.231324 | 46.879317 | 57.588172 | zn | 24.740818 | 45.383649 | 57.711509 |
| h | 24.722825 | 49.907602 | 59.964002 | zn | 26.672531 | 46.036213 | 60.755973 |
| h | 26.349724 | 50.370816 | 59.403955 | c  | 28.696790 | 43.827444 | 55.602026 |
| h | 24.863142 | 48.803345 | 57.432210 | c  | 28.556531 | 45.329104 | 55.692420 |
| c | 27.055906 | 49.115650 | 62.504984 | o  | 29.648421 | 42.190453 | 58.958650 |
| h | 26.357383 | 48.751053 | 61.741976 | p  | 29.752457 | 43.590368 | 58.164015 |
| h | 27.516715 | 50.016761 | 62.075900 | o  | 31.351579 | 43.575131 | 57.637480 |
| c | 28.141815 | 48.096737 | 62.708352 | o  | 29.028721 | 43.124812 | 56.836486 |
| n | 28.213283 | 46.908077 | 61.989180 | s  | 29.137609 | 45.177886 | 59.066014 |
| c | 29.338511 | 46.304235 | 62.332761 | c  | 30.574873 | 41.703639 | 59.937253 |
| h | 29.689834 | 45.362291 | 61.928296 | c  | 30.643143 | 42.534826 | 61.203636 |
| n | 30.004143 | 47.039391 | 63.246478 | n  | 34.728354 | 44.527092 | 59.728873 |
| h | 30.899869 | 46.824500 | 63.677580 | c  | 34.801090 | 43.621315 | 58.732010 |
| c | 29.270869 | 48.179895 | 63.496089 | c  | 36.126998 | 42.941387 | 58.531935 |
| h | 29.613835 | 48.949750 | 64.181436 | c  | 33.688810 | 43.312883 | 57.940579 |
| c | 24.540846 | 45.635249 | 65.999351 | c  | 32.483620 | 43.933076 | 58.302984 |
| h | 25.007137 | 46.494409 | 66.500515 | n  | 32.424250 | 44.837775 | 59.262190 |
| h | 25.067583 | 44.732248 | 66.343260 | c  | 33.552881 | 45.136579 | 59.919756 |
| c | 24.644291 | 45.759674 | 64.514564 | c  | 33.477020 | 46.218960 | 60.974962 |
| n | 23.661693 | 45.420037 | 63.599330 | c  | 33.206074 | 45.575330 | 62.347490 |
| h | 22.682353 | 45.160482 | 63.799516 | c  | 32.444494 | 47.292215 | 60.626685 |
| c | 24.137888 | 45.652583 | 62.360936 | h  | 27.799372 | 45.634791 | 56.424937 |
| h | 23.585606 | 45.446563 | 61.452548 | h  | 28.237108 | 45.687417 | 54.699309 |
| n | 25.373370 | 46.117496 | 62.420759 | h  | 29.508549 | 45.823773 | 55.927577 |
| c | 25.712950 | 46.173596 | 63.753585 | h  | 27.743945 | 43.374483 | 55.304023 |
| h | 26.706822 | 46.463188 | 64.083408 | h  | 29.475367 | 43.541360 | 54.878611 |
| c | 22.040085 | 40.874911 | 64.679906 | h  | 30.986963 | 43.556198 | 60.987353 |
| h | 21.778762 | 41.394435 | 65.614907 | h  | 31.356417 | 42.071524 | 61.903150 |
| h | 22.534498 | 39.932929 | 64.964848 | h  | 29.666283 | 42.586853 | 61.701989 |
| c | 23.002328 | 41.650917 | 63.840350 | h  | 31.570260 | 41.605369 | 59.470334 |
| n | 24.263994 | 42.015909 | 64.290750 | h  | 30.213754 | 40.690409 | 60.168369 |
| h | 24.599711 | 41.962284 | 65.266237 | h  | 36.212955 | 42.498333 | 57.529330 |



h 36.253149 42.138777 59.278629  
h 36.944271 43.659180 58.696259  
h 33.737426 42.613678 57.105038  
h 32.242731 45.041503 62.341432  
h 33.985152 44.846139 62.615495  
h 33.171930 46.342423 63.136508  
h 31.431508 46.868786 60.586873  
h 32.646895 47.737032 59.643373  
h 32.463841 48.098480 61.372918  
h 34.479621 46.673219 60.996258  
o 25.290854 45.213585 59.620731  
h 25.013276 44.323340 59.870990  
o 26.076078 43.831728 57.074861  
h 25.589736 43.074929 56.657613  
h 26.612370 43.433077 57.781294  
o 27.115346 44.051162 61.442189  
h 27.758288 43.862413 62.161236  
h 27.178689 43.396823 60.703278  
o 26.663346 42.299983 59.429683  
h 25.683240 42.423814 59.358570  
h 26.767862 41.431942 59.872440  
o 24.877790 41.756404 55.912343  
h 25.434582 40.989678 56.188538  
h 23.989850 41.577205 56.291997  
o 28.560714 43.689415 63.687162  
h 28.108086 43.586584 64.570379  
h 29.512853 43.731480 63.918785  
h 18.697604 46.988385 58.315865  
h 22.202878 45.138036 51.957518  
h 30.161633 53.306575 57.974111  
h 24.925978 50.825008 58.440662  
h 26.462288 49.452952 63.354637  
h 23.508588 45.576316 66.344366  
h 21.120669 40.657819 64.136204  
h 21.015491 42.306217 58.272348

**TS2**

c 19.276616 46.854344 59.263974  
h 19.035111 47.763571 59.837022  
h 18.830578 46.007116 59.804854  
c 20.771391 46.716201 59.156638  
n 21.580495 47.135584 60.205363  
h 21.269125 47.253549 61.183014  
c 22.873993 46.946613 59.843772

h 23.728539 47.233264 60.446536  
n 22.956364 46.416264 58.635851  
c 21.654222 46.268334 58.191458  
h 21.452315 45.857849 57.205965  
c 23.173859 45.050186 52.155786  
h 23.367222 43.966725 52.155142  
h 23.824543 45.508036 51.391962  
c 23.503599 45.586425 53.505389  
n 23.952910 46.873609 53.727801  
h 24.117654 47.572073 53.002751  
c 24.168620 47.019576 55.057141  
h 24.595481 47.902399 55.524353  
n 23.866734 45.904691 55.696260  
c 23.453565 44.999425 54.748920  
h 23.159079 43.985851 55.010676  
c 29.605670 52.556181 57.527756  
h 28.542550 52.819547 57.671154  
h 29.805257 52.644433 56.448910  
c 29.900238 51.148215 57.943861  
c 29.609895 50.498298 59.124307  
h 29.075555 50.857739 60.000186  
n 30.124430 49.220583 59.095250  
h 29.979062 48.512565 59.802948  
c 30.737964 48.996680 57.882770  
c 31.380177 47.859338 57.370589  
h 31.447590 46.945893 57.954142  
c 31.905431 47.941723 56.085463  
h 32.387744 47.058449 55.659557  
c 31.839753 49.141476 55.340373  
h 32.286024 49.182197 54.348838  
c 31.225000 50.275681 55.859758  
h 31.198181 51.203649 55.284928  
c 30.629459 50.203081 57.133488  
c 26.045612 50.295933 58.914232  
n 26.280143 49.110084 58.131419  
c 25.935978 47.836012 58.475828  
o 25.768841 47.568665 59.712395  
o 25.802935 47.027453 57.516520  
h 25.546968 50.027316 59.853456  
h 26.981542 50.826292 59.152998  
h 26.409704 49.236361 57.135339  
c 26.906437 49.067080 62.419446  
h 26.165599 48.713563 61.689447  
h 27.365195 49.960712 61.968628

|    |           |           |           |   |           |           |           |
|----|-----------|-----------|-----------|---|-----------|-----------|-----------|
| c  | 27.976140 | 48.024708 | 62.564374 | o | 28.357100 | 43.795582 | 57.151220 |
| n  | 27.985441 | 46.830127 | 61.846897 | s | 28.886443 | 46.426571 | 58.742085 |
| c  | 29.110595 | 46.198647 | 62.149876 | c | 29.535859 | 42.211146 | 59.751285 |
| h  | 29.435245 | 45.253967 | 61.726177 | c | 30.199278 | 42.082719 | 61.107337 |
| n  | 29.828030 | 46.920654 | 63.034100 | n | 34.251826 | 44.609648 | 59.692647 |
| h  | 30.732690 | 46.676116 | 63.425303 | c | 34.155384 | 43.738641 | 58.664154 |
| c  | 29.139097 | 48.083017 | 63.303267 | c | 35.408131 | 42.980972 | 58.318094 |
| h  | 29.527029 | 48.845520 | 63.972209 | c | 32.954648 | 43.554630 | 57.976714 |
| c  | 24.505838 | 45.589359 | 65.813629 | c | 31.823933 | 44.247687 | 58.464513 |
| h  | 24.996655 | 46.478670 | 66.231036 | n | 31.926099 | 45.063696 | 59.506194 |
| h  | 25.047379 | 44.711365 | 66.195628 | c | 33.140990 | 45.260975 | 60.037845 |
| c  | 24.535787 | 45.607355 | 64.316896 | c | 33.242181 | 46.313980 | 61.121039 |
| n  | 23.520321 | 45.172874 | 63.482402 | c | 32.964573 | 45.670305 | 62.489259 |
| h  | 22.553781 | 44.940338 | 63.757387 | c | 32.317170 | 47.489523 | 60.809570 |
| c  | 23.922505 | 45.321393 | 62.204945 | h | 27.576124 | 45.910730 | 55.646444 |
| h  | 23.308766 | 45.045897 | 61.354420 | h | 28.737087 | 45.642332 | 54.304168 |
| n  | 25.145946 | 45.815706 | 62.161084 | h | 29.322959 | 46.192710 | 55.890492 |
| c  | 25.549007 | 45.985402 | 63.470079 | h | 28.070277 | 43.459476 | 55.189194 |
| h  | 26.547150 | 46.321083 | 63.726882 | h | 29.780620 | 43.755604 | 55.642679 |
| c  | 21.926416 | 40.849602 | 64.687982 | h | 31.000632 | 42.830138 | 61.215378 |
| h  | 21.666909 | 41.421702 | 65.591795 | h | 30.644437 | 41.083599 | 61.227601 |
| h  | 22.394669 | 39.914166 | 65.031386 | h | 29.477510 | 42.237243 | 61.921841 |
| c  | 22.921755 | 41.555188 | 63.829082 | h | 30.258722 | 42.085111 | 58.934831 |
| n  | 24.186613 | 41.893150 | 64.289149 | h | 28.711480 | 41.504542 | 59.600100 |
| h  | 24.506119 | 41.871183 | 65.271285 | h | 35.371586 | 42.555218 | 57.305094 |
| c  | 24.938326 | 42.359305 | 63.284265 | h | 35.557596 | 42.161907 | 59.042896 |
| h  | 25.957001 | 42.726162 | 63.338843 | h | 36.277738 | 43.648961 | 58.412628 |
| n  | 24.196935 | 42.321310 | 62.182726 | h | 32.876714 | 42.899064 | 57.108766 |
| h  | 24.422696 | 42.591183 | 61.201408 | h | 31.981710 | 45.171793 | 62.487282 |
| c  | 22.944185 | 41.848830 | 62.487318 | h | 33.714463 | 44.901614 | 62.728674 |
| h  | 22.174789 | 41.756712 | 61.728750 | h | 32.983398 | 46.422919 | 63.293254 |
| c  | 21.695331 | 42.499103 | 59.112535 | h | 31.287676 | 47.130276 | 60.682595 |
| h  | 21.189999 | 43.292538 | 59.690793 | h | 32.615882 | 47.977477 | 59.872858 |
| h  | 21.728616 | 41.609943 | 59.748960 | h | 32.339063 | 48.245050 | 61.603138 |
| c  | 23.110275 | 42.985680 | 58.796009 | h | 34.286562 | 46.660381 | 61.101119 |
| o  | 23.281481 | 43.766735 | 57.834224 | o | 26.538375 | 44.694765 | 58.997706 |
| o  | 24.033858 | 42.604478 | 59.582778 | h | 26.270605 | 43.802683 | 59.265818 |
| zn | 24.679407 | 45.355716 | 57.607926 | o | 25.801858 | 44.036295 | 56.404588 |
| zn | 26.528638 | 45.881625 | 60.583678 | h | 25.403897 | 43.137375 | 56.281582 |
| c  | 28.745869 | 44.096792 | 55.772411 | h | 26.582209 | 43.891187 | 56.969628 |
| c  | 28.583381 | 45.552990 | 55.391211 | o | 26.949634 | 43.836326 | 61.651910 |
| o  | 28.950476 | 43.536731 | 59.681467 | h | 27.645242 | 43.773498 | 62.344555 |
| p  | 28.978662 | 44.533299 | 58.437339 | h | 27.144141 | 43.178786 | 60.956946 |
| o  | 30.653712 | 44.070849 | 57.856216 | o | 26.540265 | 41.805634 | 59.627071 |

h 25.596139 41.984896 59.406230  
h 26.522303 41.046741 60.258009  
o 24.901926 41.553098 56.074325  
h 25.457755 40.838765 56.463560  
h 23.995162 41.392017 56.416563  
o 28.563742 43.692720 63.791940  
h 28.119987 43.565064 64.677709  
h 29.519311 43.742787 64.008379  
h 18.717521 46.936716 58.331936  
h 22.127895 45.181187 51.878543  
h 30.176794 53.340809 58.023984  
h 25.402044 50.969788 58.348717  
h 26.366639 49.413709 63.300657  
h 23.491008 45.563361 66.210505  
h 21.009558 40.626206 64.142517  
h 21.035805 42.291308 58.269971

**PC2**

c 19.172207 46.965470 59.263952  
h 18.911040 47.879514 59.821215  
h 18.745619 46.116659 59.819857  
c 20.662803 46.846253 59.150483  
n 21.497132 47.165712 60.213992  
h 21.216852 47.232505 61.207295  
c 22.778834 46.978850 59.824346  
h 23.644812 47.192002 60.444574  
n 22.825653 46.550236 58.571970  
c 21.517383 46.466842 58.137721  
h 21.292805 46.132244 57.128828  
c 23.138947 45.026758 52.081314  
h 23.321445 43.941990 52.082139  
h 23.772624 45.476264 51.299031  
c 23.505324 45.565906 53.416201  
n 23.903525 46.868559 53.636540  
h 24.032188 47.576462 52.911535  
c 24.128395 47.024555 54.958407  
h 24.475567 47.945834 55.416452  
n 23.887438 45.891504 55.595450  
c 23.503946 44.966234 54.653219  
h 23.254761 43.941097 54.916617  
c 29.628849 52.510897 57.516564  
h 28.560994 52.775330 57.618724  
h 29.863918 52.585557 56.443864  
c 29.904959 51.101278 57.957042

c 29.595072 50.468845 59.144441  
h 29.065940 50.852295 60.013884  
n 30.074415 49.174835 59.128148  
h 29.986874 48.497513 59.875419  
c 30.695942 48.926670 57.922332  
c 31.323771 47.769161 57.434751  
h 31.390129 46.861463 58.033703  
c 31.863845 47.831612 56.153757  
h 32.344922 46.937481 55.748797  
c 31.824515 49.022535 55.390821  
h 32.289695 49.044053 54.405068  
c 31.221204 50.173819 55.887711  
h 31.220511 51.096871 55.302747  
c 30.615988 50.128484 57.159488  
c 25.857169 50.125196 58.630343  
n 25.705094 48.824248 58.012963  
c 25.824136 47.639201 58.663533  
o 25.912089 47.648896 59.940332  
o 25.828709 46.577537 57.978820  
h 25.565957 50.050193 59.685736  
h 26.899294 50.486698 58.576617  
h 25.828517 48.754381 57.010094  
c 27.048025 49.125757 62.639141  
h 26.355011 48.692827 61.904863  
h 27.461599 50.021183 62.152591  
c 28.176474 48.164715 62.883726  
n 28.312564 46.999449 62.140223  
c 29.468230 46.435363 62.471783  
h 29.880993 45.524017 62.045143  
n 30.083955 47.182147 63.401563  
h 30.984446 46.992068 63.839840  
c 29.298807 48.279771 63.676728  
h 29.609238 49.049943 64.377179  
c 24.600169 45.571884 65.762536  
h 25.068026 46.460648 66.207415  
h 25.127714 44.699516 66.175321  
c 24.752483 45.573750 64.271192  
n 23.775880 45.294333 63.328214  
h 22.775473 45.114868 63.515194  
c 24.343759 45.325291 62.103750  
h 23.815073 45.079889 61.187901  
n 25.635668 45.613203 62.201146  
c 25.907147 45.764299 63.547300  
h 26.909759 45.946703 63.922069

c 21.870459 40.830102 64.692190  
h 21.615510 41.394042 65.601963  
h 22.349942 39.897337 65.026656  
c 22.847063 41.549736 63.825509  
n 24.132350 41.862978 64.248037  
h 24.488784 41.808379 65.217720  
c 24.850503 42.362220 63.235297  
h 25.901609 42.683556 63.254488  
n 24.059953 42.368613 62.163781  
h 24.229572 42.729480 61.211481  
c 22.815102 41.896342 62.498030  
h 22.015654 41.848280 61.767971  
c 21.468480 42.556397 59.097776  
h 20.880711 43.261431 59.710289  
h 21.637444 41.668814 59.716363  
c 22.782308 43.243474 58.760092  
o 22.882811 43.863895 57.671981  
o 23.709627 43.218729 59.631059  
zn 24.283678 45.392482 57.534968  
zn 27.017698 46.188274 60.733212  
c 28.741761 43.315475 56.544494  
c 28.826859 44.664004 55.867226  
o 29.706399 43.429089 60.253083  
p 28.828555 44.244980 59.183892  
o 30.874873 43.889632 57.975481  
o 28.279430 43.399020 57.927964  
s 28.982765 46.209319 59.111866  
c 29.832256 41.995283 60.250725  
c 30.332845 41.594261 61.621647  
n 34.482336 44.578348 59.745560  
c 34.396137 43.675792 58.736808  
c 35.676940 42.966186 58.379985  
c 33.201883 43.417114 58.078390  
c 32.018823 44.107686 58.504228  
n 32.151541 45.026387 59.492948  
c 33.347282 45.224338 60.037863  
c 33.413294 46.277292 61.128944  
c 33.133650 45.609977 62.485466  
c 32.460588 47.434154 60.831864  
h 27.870898 45.204753 55.938521  
h 29.073127 44.502273 54.804467  
h 29.625263 45.268485 56.315469  
h 27.981429 42.672916 56.077253  
h 29.712621 42.819977 56.561611

h 31.353102 41.965247 61.800234  
h 30.325724 40.500008 61.724935  
h 29.663565 42.003682 62.387540  
h 30.523853 41.720620 59.439538  
h 28.848289 41.541104 60.034792  
h 35.627103 42.510492 57.379790  
h 35.897303 42.175928 59.118734  
h 36.516089 43.679639 58.417582  
h 33.145823 42.705443 57.251762  
h 32.148569 45.115388 62.476229  
h 33.879980 44.831123 62.702386  
h 33.154427 46.338221 63.313298  
h 31.440010 47.048185 60.706469  
h 32.737329 47.931317 59.892851  
h 32.472185 48.187970 61.628858  
h 34.449682 46.645539 61.121723  
o 27.377634 44.137856 60.035914  
h 26.823864 43.291543 59.832245  
o 25.670217 43.950363 57.138280  
h 25.351450 43.082521 56.769135  
h 26.519024 43.804572 57.590194  
o 27.715136 43.042889 62.842431  
h 28.155048 43.678966 63.462013  
h 27.775940 43.449181 61.960444  
o 26.071522 42.062903 59.420119  
h 25.148364 42.409507 59.342925  
h 26.076237 41.326765 60.081794  
o 24.749664 41.745678 56.051127  
h 25.290840 40.959857 56.309741  
h 23.850800 41.552256 56.399180  
o 28.839663 44.620766 64.711571  
h 28.372378 44.107408 65.434287  
h 29.772166 44.312641 64.757234  
h 18.625290 47.020985 58.322747  
h 22.085772 45.169105 51.839185  
h 30.175375 53.312615 58.013175  
h 25.208980 50.852332 58.141272  
h 26.443322 49.480772 63.473626  
h 23.570147 45.541728 66.117798  
h 20.951545 40.604512 64.151105  
h 20.836568 42.291458 58.250097

**TS3a**

c 19.320750 46.910638 59.176334

h 19.109627 47.836601 59.734499  
h 18.909146 46.078127 59.765492  
c 20.806927 46.762143 58.991575  
n 21.666063 47.109098 60.025958  
h 21.388519 47.183673 61.019592  
c 22.938416 46.912762 59.603189  
h 23.818267 47.110017 60.205465  
n 22.960944 46.456816 58.364262  
c 21.642771 46.353888 57.966040  
h 21.393751 45.994721 56.970205  
c 23.308934 44.844016 52.210508  
h 23.397844 43.749785 52.178772  
h 23.971776 45.258582 51.431597  
c 23.755432 45.306870 53.554596  
n 24.234522 46.581842 53.798239  
h 24.300348 47.329790 53.104782  
c 24.625510 46.648344 55.089973  
h 25.100869 47.501426 55.563221  
n 24.418213 45.486106 55.693090  
c 23.871627 44.637688 54.753598  
h 23.615147 43.607947 54.983791  
c 29.592046 52.536728 57.446307  
h 28.537806 52.857993 57.517422  
h 29.866580 52.625862 56.383374  
c 29.731191 51.091095 57.826279  
c 29.075533 50.371377 58.804453  
h 28.371538 50.716497 59.559444  
n 29.412008 49.033749 58.728652  
h 28.901706 48.297926 59.212463  
c 30.284941 48.849494 57.675672  
c 30.905617 47.691458 57.187068  
h 30.743191 46.730725 57.666443  
c 31.735724 47.817785 56.076705  
h 32.233078 46.923969 55.688955  
c 31.949027 49.070640 55.457322  
h 32.603162 49.136120 54.588761  
c 31.343343 50.223117 55.949620  
h 31.516095 51.184971 55.463085  
c 30.508354 50.128047 57.081475  
c 25.304244 50.083634 59.069847  
n 25.353753 48.899171 58.255357  
c 26.078073 47.776912 58.506412  
o 26.677989 47.701823 59.630248  
o 26.076897 46.898094 57.598461  
h 24.676077 49.969608 59.972005  
h 26.308883 50.387559 59.392726  
h 24.845924 48.896314 57.382432  
c 27.041927 49.119122 62.481771  
h 26.333422 48.754004 61.728108  
h 27.496364 50.021124 62.046745  
c 28.131792 48.099891 62.667140  
n 28.202501 46.915465 61.938168  
c 29.333168 46.312870 62.268944  
h 29.686823 45.375575 61.852801  
n 30.001429 47.043475 63.182913  
h 30.903570 46.828736 63.599745  
c 29.267294 48.179753 63.445802  
h 29.614138 48.945294 64.134009  
c 24.535890 45.692372 65.980575  
h 24.984830 46.563103 66.477524  
h 25.088486 44.805380 66.323156  
c 24.626764 45.811141 64.492629  
n 23.629638 45.480251 63.590778  
h 22.649529 45.229598 63.798451  
c 24.097422 45.688254 62.345576  
h 23.523387 45.473520 61.453478  
n 25.340445 46.133014 62.384486  
c 25.693914 46.199366 63.714110  
h 26.695959 46.476809 64.029892  
c 22.002364 40.848659 64.709018  
h 21.723927 41.328319 65.659471  
h 22.500894 39.900723 64.965130  
c 22.978463 41.662058 63.926457  
n 24.205246 42.048004 64.449208  
h 24.509520 41.965885 65.433015  
c 24.966212 42.607164 63.501516  
h 25.968432 43.007035 63.620378  
n 24.260152 42.587323 62.376281  
h 24.532279 42.876621 61.432082  
c 23.026049 42.028367 62.604007  
h 22.298548 41.925660 61.807087  
c 21.657881 42.528255 59.120477  
h 21.170552 43.359460 59.659954  
h 21.632633 41.666984 59.796477  
c 23.098109 42.939748 58.846387  
o 23.390570 43.582167 57.809243  
o 23.943066 42.622809 59.749270  
zn 24.766660 45.309094 57.738219

zn 26.686465 45.979075 60.743495  
c 28.279994 44.347143 55.152477  
c 28.047364 45.838500 55.228582  
o 29.063383 42.380935 58.194643  
p 29.338561 43.889001 57.689893  
o 31.110740 43.658751 57.519309  
o 29.243550 43.870326 56.106499  
s 28.952220 45.383636 58.865886  
c 29.877339 41.679715 59.148766  
c 30.068552 42.373877 60.488590  
n 34.488795 44.583204 59.599011  
c 34.525072 43.634544 58.638737  
c 35.834404 42.918995 58.441656  
c 33.398134 43.322912 57.880433  
c 32.202421 44.005987 58.197408  
n 32.185306 44.952634 59.128628  
c 33.327585 45.222376 59.774851  
c 33.283618 46.307139 60.833638  
c 33.046143 45.644367 62.203036  
c 32.246336 47.385780 60.519942  
h 27.581020 46.125419 56.179806  
h 27.364566 46.127046 54.413576  
h 28.989618 46.390089 55.107207  
h 27.345715 43.784206 55.266781  
h 28.737941 44.061606 54.193582  
h 30.646416 43.303632 60.393204  
h 30.614519 41.696499 61.165018  
h 29.107955 42.627345 60.950574  
h 30.856009 41.473597 58.685324  
h 29.350417 40.723522 59.281761  
h 35.897071 42.450599 57.448603  
h 35.958322 42.132680 59.206337  
h 36.668609 43.624350 58.572966  
h 33.418902 42.584143 57.078034  
h 32.087918 45.099670 62.208720  
h 33.836415 44.915613 62.437442  
h 33.029829 46.398723 63.005992  
h 31.238291 46.955163 60.448357  
h 32.454160 47.868195 59.555637  
h 32.250658 48.164567 61.296625  
h 34.287404 46.760070 60.843860  
o 25.363006 45.052552 59.596107  
h 24.987852 44.217446 59.901802  
o 26.945549 43.712188 57.493879

h 26.415228 43.040619 56.985505  
h 26.876625 43.387985 58.409223  
o 27.139289 44.069438 61.606525  
h 27.779483 43.884748 62.334970  
h 27.072564 43.319415 60.969353  
o 26.539333 42.156433 59.810689  
h 25.566527 42.249254 59.641209  
h 26.650617 41.275943 60.238588  
o 25.239527 42.056009 56.213900  
h 25.557416 41.145328 56.411610  
h 24.389611 42.165303 56.679396  
o 28.634370 43.728145 63.760848  
h 28.210189 43.638848 64.660229  
h 29.595499 43.768738 63.953859  
h 18.716681 46.967369 58.270824  
h 22.271620 45.070378 51.963917  
h 30.152266 53.309146 57.973175  
h 24.886261 50.864502 58.434550  
h 26.459340 49.457200 63.338721  
h 23.507365 45.610836 66.332080  
h 21.092826 40.641844 64.145073  
h 21.017718 42.314884 58.264480

### IM3

c 19.183884 46.921261 59.296562  
h 18.935660 47.836587 59.856524  
h 18.734311 46.078938 59.841080  
c 20.675473 46.779594 59.197072  
n 21.505366 47.177472 60.238479  
h 21.212047 47.291441 61.224881  
c 22.790009 46.982228 59.866854  
h 23.661403 47.230235 60.467760  
n 22.839177 46.469565 58.645828  
c 21.534674 46.333140 58.214280  
h 21.318753 45.927795 57.229087  
c 23.206488 44.888031 52.206612  
h 23.306927 43.793879 52.207625  
h 23.878806 45.290338 51.430090  
c 23.608420 45.399842 53.545702  
n 24.064011 46.688141 53.759198  
h 24.178370 47.401607 53.036281  
c 24.362815 46.823514 55.067012  
h 24.782100 47.711794 55.528713  
n 24.115088 45.690013 55.709100

|   |           |           |           |    |           |           |           |
|---|-----------|-----------|-----------|----|-----------|-----------|-----------|
| c | 23.642808 | 44.789130 | 54.778986 | h  | 22.668923 | 44.991055 | 63.688015 |
| h | 23.358545 | 43.775839 | 55.051103 | c  | 24.126057 | 45.351182 | 62.195198 |
| c | 29.629532 | 52.509505 | 57.485425 | h  | 23.568467 | 45.047832 | 61.316222 |
| h | 28.565958 | 52.799644 | 57.559770 | n  | 25.357910 | 45.825493 | 62.211540 |
| h | 29.893325 | 52.592009 | 56.419485 | c  | 25.691681 | 46.003531 | 63.535336 |
| c | 29.826229 | 51.074081 | 57.889341 | h  | 26.679724 | 46.331627 | 63.839807 |
| c | 29.317263 | 50.378852 | 58.969538 | c  | 22.003849 | 40.855592 | 64.665009 |
| h | 28.732114 | 50.743508 | 59.810958 | h  | 21.735122 | 41.400299 | 65.582586 |
| n | 29.653962 | 49.043747 | 58.879481 | h  | 22.453127 | 39.905063 | 64.991768 |
| h | 29.331446 | 48.297002 | 59.484831 | c  | 23.047633 | 41.570381 | 63.871301 |
| c | 30.393064 | 48.836589 | 57.736197 | n  | 24.272500 | 41.908715 | 64.432883 |
| c | 30.958382 | 47.663043 | 57.219824 | h  | 24.524539 | 41.861875 | 65.434610 |
| h | 30.837095 | 46.713906 | 57.733000 | c  | 25.106748 | 42.372588 | 63.497777 |
| c | 31.688381 | 47.769514 | 56.040253 | h  | 26.127453 | 42.709429 | 63.648455 |
| h | 32.147537 | 46.866442 | 55.628069 | n  | 24.455208 | 42.336141 | 62.339966 |
| c | 31.855717 | 49.013796 | 55.387962 | h  | 24.823011 | 42.619267 | 61.430709 |
| h | 32.444196 | 49.063266 | 54.472995 | c  | 23.175647 | 41.865469 | 62.535475 |
| c | 31.284832 | 50.176256 | 55.898728 | h  | 22.472332 | 41.773447 | 61.716323 |
| h | 31.424491 | 51.130711 | 55.385686 | c  | 21.694862 | 42.505149 | 59.096705 |
| c | 30.535333 | 50.100121 | 57.090405 | h  | 21.215761 | 43.323961 | 59.661940 |
| c | 25.809131 | 50.236833 | 58.943280 | h  | 21.698417 | 41.635300 | 59.761176 |
| n | 26.026421 | 49.074776 | 58.124985 | c  | 23.119229 | 42.941038 | 58.781951 |
| c | 25.979901 | 47.781440 | 58.529446 | o  | 23.358776 | 43.639312 | 57.757103 |
| o | 25.961945 | 47.530215 | 59.776288 | o  | 24.013551 | 42.622005 | 59.630199 |
| o | 25.912679 | 46.917425 | 57.597440 | zn | 24.425638 | 45.541591 | 57.719734 |
| h | 25.255239 | 49.962964 | 59.851204 | zn | 26.825140 | 45.849073 | 60.630949 |
| h | 26.747474 | 50.729145 | 59.239785 | c  | 28.508307 | 44.562420 | 55.206131 |
| h | 26.116989 | 49.208425 | 57.126382 | c  | 27.889017 | 45.941327 | 55.074416 |
| c | 26.981959 | 49.097687 | 62.489791 | o  | 29.012267 | 42.537253 | 58.230887 |
| h | 26.276724 | 48.684148 | 61.756025 | p  | 29.109462 | 44.130748 | 57.859692 |
| h | 27.411864 | 49.993928 | 62.017669 | o  | 30.938310 | 43.946477 | 57.887496 |
| c | 28.085404 | 48.104984 | 62.706392 | o  | 29.431280 | 44.476911 | 56.297755 |
| n | 28.176629 | 46.915651 | 61.988470 | s  | 28.979263 | 45.573777 | 59.307912 |
| c | 29.301740 | 46.318956 | 62.362528 | c  | 29.913469 | 41.738603 | 58.989214 |
| h | 29.678587 | 45.385486 | 61.960254 | c  | 30.026477 | 42.142802 | 60.451190 |
| n | 29.939117 | 47.060122 | 63.287019 | n  | 34.397589 | 44.684746 | 59.900377 |
| h | 30.838643 | 46.860605 | 63.718800 | c  | 34.341084 | 43.679361 | 58.997482 |
| c | 29.199984 | 48.199562 | 63.513146 | c  | 35.592410 | 42.858254 | 58.834562 |
| h | 29.531440 | 48.972996 | 64.200232 | c  | 33.185004 | 43.412855 | 58.273148 |
| c | 24.541817 | 45.639186 | 65.827386 | c  | 32.042926 | 44.219285 | 58.530287 |
| h | 25.000290 | 46.539271 | 66.258541 | n  | 32.131782 | 45.229204 | 59.397183 |
| h | 25.093782 | 44.776499 | 66.225647 | c  | 33.290066 | 45.424384 | 60.029251 |
| c | 24.627133 | 45.652699 | 64.333162 | c  | 33.317018 | 46.555521 | 61.034807 |
| n | 23.645557 | 45.229435 | 63.452953 | c  | 33.085307 | 45.941925 | 62.427434 |

c 32.300701 47.643375 60.691844  
h 27.298148 46.197644 55.964270  
h 27.224293 45.967838 54.193155  
h 28.676563 46.696592 54.944059  
h 27.730016 43.789256 55.282242  
h 29.130135 44.327317 54.326121  
h 30.361537 43.185242 60.550744  
h 30.763540 41.498994 60.956075  
h 29.066298 42.036239 60.973328  
h 30.907095 41.742294 58.518498  
h 29.489471 40.724125 58.914456  
h 35.600424 42.305040 57.884230  
h 35.687329 42.133819 59.662160  
h 36.475378 43.513935 58.882185  
h 33.140352 42.622505 57.522015  
h 32.138744 45.376832 62.434655  
h 33.887899 45.235989 62.687732  
h 33.038471 46.718617 63.204970  
h 31.277216 47.250125 60.746574  
h 32.441914 48.001855 59.663777  
h 32.394368 48.502054 61.368589  
h 34.332565 46.977993 60.997257  
o 25.617105 44.689972 59.179380  
h 25.175712 43.843285 59.443229  
o 27.398843 44.093044 57.604788  
h 27.001965 43.300820 57.159471  
h 26.437956 44.433826 58.567418  
o 27.029294 43.825506 61.452611  
h 27.685774 43.716309 62.180642  
h 27.134849 43.097393 60.796180  
o 26.639370 41.766255 59.775803  
h 25.714785 41.849137 59.477801  
h 26.672688 40.940685 60.317890  
o 25.737400 42.380400 56.418691  
h 25.931519 41.431671 56.607334  
h 24.864819 42.570434 56.809045  
o 28.542214 43.623975 63.644880  
h 28.139074 43.626842 64.558734  
h 29.505630 43.688274 63.824401  
h 18.644104 46.990975 58.352187  
h 22.170336 45.100528 51.943363  
h 30.172412 53.304087 57.997273  
h 25.217511 50.939615 58.356638  
h 26.406895 49.447714 63.347024

h 23.517560 45.591366 66.197085  
h 21.092686 40.651836 64.102576  
h 21.032711 42.297520 58.256161

### TS3b

c 19.157411 46.931148 59.306471  
h 18.903410 47.845158 59.865746  
h 18.709743 46.086040 59.848237  
c 20.648134 46.795912 59.210319  
n 21.479949 47.193136 60.249930  
h 21.189699 47.306862 61.237561  
c 22.763713 47.000421 59.875698  
h 23.636726 47.247967 60.474226  
n 22.808369 46.490629 58.652975  
c 21.504399 46.353563 58.224167  
h 21.288257 45.951556 57.237755  
c 23.203164 44.884795 52.206959  
h 23.301729 43.790581 52.208348  
h 23.874854 45.286437 51.429800  
c 23.604472 45.396931 53.545198  
n 24.070415 46.681264 53.757769  
h 24.195572 47.391886 53.033072  
c 24.355600 46.820162 55.067691  
h 24.776198 47.707828 55.528798  
n 24.089185 45.691747 55.712326  
c 23.619045 44.790985 54.781032  
h 23.318492 43.782490 55.052745  
c 29.639169 52.494115 57.479177  
h 28.574019 52.782271 57.539327  
h 29.915325 52.571590 56.416099  
c 29.834555 51.060570 57.895801  
c 29.335415 50.381325 58.990365  
h 28.758044 50.758271 59.832053  
n 29.673977 49.044953 58.917032  
h 29.379786 48.318128 59.557796  
c 30.406170 48.818497 57.770999  
c 30.975080 47.637405 57.271033  
h 30.886818 46.687167 57.796213  
c 31.691923 47.733474 56.081595  
h 32.156878 46.826378 55.685127  
c 31.848549 48.968622 55.408330  
h 32.434049 49.008670 54.489710  
c 31.279094 50.137069 55.907524  
h 31.416536 51.086907 55.384464



|   |           |           |           |    |           |           |           |
|---|-----------|-----------|-----------|----|-----------|-----------|-----------|
| c | 30.537768 | 50.073861 | 57.105248 | h  | 21.175004 | 43.329392 | 59.652386 |
| c | 25.789041 | 50.221582 | 58.903743 | h  | 21.661040 | 41.643145 | 59.761666 |
| n | 25.938086 | 49.041829 | 58.093980 | c  | 23.081365 | 42.947317 | 58.792423 |
| c | 25.947827 | 47.760761 | 58.529930 | o  | 23.340131 | 43.635619 | 57.764567 |
| o | 25.953162 | 47.542494 | 59.783549 | o  | 23.962824 | 42.640311 | 59.659678 |
| o | 25.898000 | 46.866818 | 57.622755 | zn | 24.365680 | 45.554671 | 57.723408 |
| h | 25.251760 | 49.977814 | 59.830063 | zn | 26.783962 | 45.890556 | 60.690219 |
| h | 26.754132 | 50.681073 | 59.165735 | c  | 28.428604 | 44.521098 | 55.149606 |
| h | 26.038483 | 49.158523 | 57.093991 | c  | 27.838110 | 45.910418 | 55.009526 |
| c | 26.993404 | 49.091536 | 62.488210 | o  | 28.938782 | 42.570239 | 58.181745 |
| h | 26.282498 | 48.689765 | 61.753641 | p  | 28.747828 | 44.111379 | 57.800955 |
| h | 27.426075 | 49.988799 | 62.020600 | o  | 31.241880 | 43.908301 | 57.731019 |
| c | 28.096433 | 48.093796 | 62.689841 | o  | 29.264124 | 44.420180 | 56.314166 |
| n | 28.185454 | 46.913744 | 61.953927 | s  | 28.893814 | 45.533652 | 59.197758 |
| c | 29.323664 | 46.320316 | 62.298286 | c  | 29.904555 | 41.832204 | 58.949116 |
| h | 29.702051 | 45.394353 | 61.878080 | c  | 30.069366 | 42.298585 | 60.384087 |
| n | 29.968387 | 47.053281 | 63.221998 | n  | 34.557953 | 44.655361 | 59.970879 |
| h | 30.881627 | 46.854756 | 63.626669 | c  | 34.577532 | 43.668318 | 59.037965 |
| c | 29.223442 | 48.182316 | 63.479344 | c  | 35.855716 | 42.877733 | 58.929840 |
| h | 29.560005 | 48.950427 | 64.169876 | c  | 33.489310 | 43.392958 | 58.230750 |
| c | 24.533871 | 45.645283 | 65.860233 | c  | 32.280706 | 44.153137 | 58.405017 |
| h | 24.992029 | 46.542582 | 66.296963 | n  | 32.305141 | 45.152287 | 59.336047 |
| h | 25.086105 | 44.779847 | 66.251751 | c  | 33.414084 | 45.356562 | 60.033586 |
| c | 24.616216 | 45.669825 | 64.367372 | c  | 33.362355 | 46.484811 | 61.051180 |
| n | 23.634822 | 45.244717 | 63.488010 | c  | 33.108357 | 45.867312 | 62.436055 |
| h | 22.659667 | 45.000195 | 63.724051 | c  | 32.324702 | 47.545420 | 60.684171 |
| c | 24.105082 | 45.383200 | 62.229872 | h  | 27.205849 | 46.156905 | 55.874284 |
| h | 23.543537 | 45.084678 | 61.351760 | h  | 27.222675 | 45.965009 | 54.095701 |
| n | 25.332111 | 45.869710 | 62.245704 | h  | 28.644979 | 46.654105 | 54.944773 |
| c | 25.673311 | 46.038495 | 63.568453 | h  | 27.639986 | 43.752103 | 55.170321 |
| h | 26.661580 | 46.371648 | 63.868887 | h  | 29.110118 | 44.284926 | 54.317923 |
| c | 22.001641 | 40.856155 | 64.669026 | h  | 30.449144 | 43.329056 | 60.423773 |
| h | 21.730272 | 41.397477 | 65.587802 | h  | 30.804679 | 41.647218 | 60.883185 |
| h | 22.450434 | 39.904699 | 64.993702 | h  | 29.127442 | 42.235875 | 60.947038 |
| c | 23.048339 | 41.574752 | 63.883145 | h  | 30.862317 | 41.875367 | 58.418056 |
| n | 24.268048 | 41.911497 | 64.455735 | h  | 29.498703 | 40.807408 | 58.929422 |
| h | 24.513423 | 41.855044 | 65.458814 | h  | 35.897118 | 42.301184 | 57.993500 |
| c | 25.109289 | 42.382293 | 63.531606 | h  | 35.951942 | 42.176281 | 59.776985 |
| h | 26.129307 | 42.717676 | 63.692249 | h  | 36.722975 | 43.555994 | 58.976042 |
| n | 24.466284 | 42.352707 | 62.368590 | h  | 33.524116 | 42.620477 | 57.459407 |
| h | 24.851204 | 42.638194 | 61.469572 | h  | 32.163629 | 45.296925 | 62.422753 |
| c | 23.185247 | 41.878169 | 62.550034 | h  | 33.909000 | 45.161666 | 62.701678 |
| h | 22.489089 | 41.789094 | 61.724686 | h  | 33.048910 | 46.637055 | 63.222201 |
| c | 21.659507 | 42.509702 | 59.093103 | h  | 31.317733 | 47.107632 | 60.658489 |

h 32.511292 47.946314 59.679821  
h 32.338621 48.384128 61.394826  
h 34.363388 46.942433 61.046285  
o 25.484556 44.719124 59.291922  
h 25.024793 43.871660 59.545464  
o 27.138249 44.017843 57.544474  
h 26.708835 43.230080 57.077404  
h 26.233480 44.436078 58.667773  
o 27.028690 43.881848 61.480387  
h 27.682665 43.765187 62.213315  
h 27.120786 43.149788 60.827560  
o 26.608103 41.832612 59.791597  
h 25.677195 41.895492 59.508601  
h 26.666346 41.002288 60.325711  
o 25.627015 42.309860 56.384778  
h 25.857562 41.367324 56.579602  
h 24.753100 42.486903 56.781042  
o 28.536967 43.668152 63.653360  
h 28.140826 43.653051 64.570518  
h 29.504167 43.706138 63.825223  
h 18.625110 46.999083 58.357732  
h 22.166554 45.099379 51.947229  
h 30.173159 53.294221 57.991769  
h 25.203987 50.937724 58.326752  
h 26.419526 49.440720 63.346581  
h 23.508485 45.594159 66.226341  
h 21.092157 40.653610 64.103446  
h 21.006269 42.298165 58.246582

### PC3

c 19.089143 46.969803 59.321367  
h 18.825371 47.882326 59.878557  
h 18.641849 46.121981 59.859693  
c 20.579613 46.843907 59.235151  
n 21.406627 47.255038 60.272664  
h 21.116199 47.371615 61.259754  
c 22.692151 47.066376 59.902908  
h 23.563586 47.329819 60.496878  
n 22.740907 46.545279 58.685079  
c 21.439483 46.398027 58.254572  
h 21.228027 45.988479 57.270350  
c 23.176279 44.930150 52.227239  
h 23.287858 43.836947 52.226325  
h 23.844734 45.341153 51.452464

c 23.570762 45.444296 53.566947  
n 24.057488 46.720879 53.776742  
h 24.196742 47.426116 53.049042  
c 24.337612 46.861680 55.087798  
h 24.771918 47.743853 55.547697  
n 24.046809 45.740772 55.736661  
c 23.565991 44.844701 54.805988  
h 23.241755 43.844133 55.079599  
c 29.669555 52.487924 57.502160  
h 28.597326 52.747820 57.573674  
h 29.931050 52.566223 56.435743  
c 29.926254 51.067916 57.930716  
c 29.583223 50.414479 59.098607  
h 29.096876 50.800682 59.991300  
n 29.963429 49.089410 59.028728  
h 29.806809 48.390061 59.742101  
c 30.566154 48.844625 57.810848  
c 31.119778 47.669357 57.285250  
h 31.160012 46.727811 57.829409  
c 31.709290 47.747333 56.027442  
h 32.158874 46.825580 55.644847  
c 31.768960 48.970047 55.318877  
h 32.267919 49.006399 54.350739  
c 31.218243 50.136273 55.844088  
h 31.291672 51.079471 55.296489  
c 30.579689 50.079969 57.099414  
c 26.124619 50.299629 58.795709  
n 26.183084 49.061143 58.060667  
c 25.960688 47.812911 58.525364  
o 25.874957 47.616335 59.781462  
o 25.820356 46.911664 57.631387  
h 25.776952 50.104061 59.817450  
h 27.109815 50.788029 58.836094  
h 26.324159 49.117221 57.059671  
c 26.990396 49.137710 62.489616  
h 26.269368 48.744672 61.760302  
h 27.413715 50.041878 62.027314  
c 28.099069 48.140618 62.657616  
n 28.163209 46.967248 61.911479  
c 29.311141 46.369167 62.208580  
h 29.662687 45.438327 61.778357  
n 29.989180 47.094934 63.113678  
h 30.906938 46.882098 63.500107  
c 29.253363 48.222419 63.407760

|    |           |           |           |   |           |           |           |
|----|-----------|-----------|-----------|---|-----------|-----------|-----------|
| h  | 29.612145 | 48.983693 | 64.094273 | c | 34.385649 | 43.797141 | 57.746706 |
| c  | 24.534434 | 45.658092 | 65.888684 | c | 33.211385 | 44.636849 | 57.683231 |
| h  | 24.991989 | 46.552354 | 66.332559 | n | 32.969676 | 45.421254 | 58.798598 |
| h  | 25.086827 | 44.789467 | 66.274140 | c | 33.799863 | 45.372617 | 59.825937 |
| c  | 24.619103 | 45.690325 | 64.395270 | c | 33.515124 | 46.312976 | 60.995673 |
| n  | 23.620931 | 45.309306 | 63.514808 | c | 33.250722 | 45.514308 | 62.282114 |
| h  | 22.642109 | 45.079024 | 63.751588 | c | 32.394410 | 47.304873 | 60.694971 |
| c  | 24.090147 | 45.436843 | 62.257139 | h | 27.236385 | 46.140401 | 55.974137 |
| h  | 23.509132 | 45.172424 | 61.380980 | h | 27.388550 | 46.094150 | 54.199488 |
| n  | 25.336792 | 45.874666 | 62.272739 | h | 28.765952 | 46.645481 | 55.208812 |
| c  | 25.688591 | 46.024689 | 63.595568 | h | 27.607439 | 43.786890 | 55.060078 |
| h  | 26.689800 | 46.322633 | 63.892328 | h | 29.173353 | 44.319241 | 54.389187 |
| c  | 22.050569 | 40.876327 | 64.650496 | h | 30.852246 | 44.221996 | 60.347860 |
| h  | 21.774326 | 41.377809 | 65.590144 | h | 32.077586 | 42.945108 | 60.360691 |
| h  | 22.506746 | 39.915864 | 64.937039 | h | 30.406291 | 42.560964 | 60.881084 |
| c  | 23.100121 | 41.632782 | 63.903399 | h | 31.178285 | 43.433017 | 58.005268 |
| n  | 24.302842 | 41.963344 | 64.514382 | h | 30.921147 | 41.746749 | 58.522036 |
| h  | 24.525664 | 41.860774 | 65.519671 | h | 36.588250 | 42.382425 | 58.073946 |
| c  | 25.165216 | 42.460304 | 63.625298 | h | 36.150383 | 42.109510 | 59.787086 |
| h  | 26.182290 | 42.788105 | 63.820922 | h | 37.231829 | 43.447309 | 59.365542 |
| n  | 24.549980 | 42.461872 | 62.445926 | h | 34.624180 | 43.168679 | 56.886669 |
| h  | 24.981687 | 42.752428 | 61.570985 | h | 32.311179 | 44.942103 | 62.190698 |
| c  | 23.265069 | 41.975272 | 62.582806 | h | 34.059331 | 44.792748 | 62.467180 |
| h  | 22.592527 | 41.908601 | 61.736391 | h | 33.168652 | 46.175656 | 63.162573 |
| c  | 21.585992 | 42.548810 | 59.076497 | h | 31.453054 | 46.772549 | 60.495801 |
| h  | 21.079443 | 43.355131 | 59.635491 | h | 32.611193 | 47.887698 | 59.792449 |
| h  | 21.591332 | 41.678930 | 59.741630 | h | 32.241549 | 48.000856 | 61.534743 |
| c  | 23.002561 | 43.017980 | 58.814363 | h | 34.450619 | 46.880891 | 61.127967 |
| o  | 23.291287 | 43.687095 | 57.782106 | o | 25.377508 | 44.784582 | 59.384207 |
| o  | 23.850178 | 42.759290 | 59.732147 | h | 24.846781 | 43.980852 | 59.668066 |
| zn | 24.296241 | 45.621303 | 57.758511 | o | 27.002828 | 43.754575 | 57.724897 |
| zn | 26.733910 | 45.986966 | 60.700198 | h | 26.544803 | 43.047229 | 57.120565 |
| c  | 28.435819 | 44.506873 | 55.181428 | h | 26.079069 | 44.379744 | 58.794746 |
| c  | 27.929824 | 45.934706 | 55.146344 | o | 27.234332 | 43.995790 | 61.370522 |
| o  | 29.220703 | 42.872823 | 58.526535 | h | 27.821634 | 43.840012 | 62.150723 |
| p  | 28.547781 | 44.157098 | 57.865497 | h | 27.221969 | 43.208638 | 60.780072 |
| o  | 32.416678 | 44.645525 | 56.715215 | o | 26.481502 | 41.880756 | 59.895839 |
| o  | 29.147497 | 44.179391 | 56.393277 | h | 25.542945 | 41.961465 | 59.642841 |
| s  | 28.677672 | 45.831924 | 58.894453 | h | 26.550266 | 41.063436 | 60.449229 |
| c  | 30.669270 | 42.794039 | 58.743020 | o | 25.545206 | 42.259808 | 56.364233 |
| c  | 31.012900 | 43.149942 | 60.174209 | h | 25.743232 | 41.301184 | 56.528902 |
| n  | 34.887919 | 44.591575 | 59.959553 | h | 24.657402 | 42.445003 | 56.728492 |
| c  | 35.158438 | 43.793949 | 58.890902 | o | 28.608147 | 43.755266 | 63.621979 |
| c  | 36.348920 | 42.881717 | 59.024762 | h | 28.204622 | 43.743299 | 64.535436 |

h 29.575507 43.762524 63.803206  
h 18.567714 47.035881 58.366479  
h 22.137876 45.133234 51.965431  
h 30.193342 53.299483 58.007220  
h 25.421861 50.964355 58.293376  
h 26.424231 49.472885 63.358628  
h 23.509122 45.603477 66.254499  
h 21.142679 40.685135 64.078441  
h 20.947320 42.332408 58.220147
